# Supplementary material
Source: publisher figshare collection journal article supplement (https://acs.figshare.com/ndownloader/files/4762159)
Supplement: Supplementary file 1 [file 4762159]

 
data_Complex3 
 
_audit_creation_method            SHELXL-97 
_chemical_name_systematic 
; 
 ? 
; 
_chemical_name_common             06026a 
_chemical_melting_point           ? 
_chemical_formula_moiety          'C75 H75 Fe N O7 Tl, C6 H12' 
_chemical_formula_sum             'C81 H87 Fe N O7 Tl' 
_chemical_formula_weight          1446.74 
 
loop_ 
 _atom_type_symbol 
 _atom_type_description 
 _atom_type_scat_dispersion_real 
 _atom_type_scat_dispersion_imag 
 _atom_type_scat_source 
 'C'  'C'   0.0033   0.0016 
 'International Tables Vol C Tables 4.2.6.8 and 6.1.1.4' 
 'H'  'H'   0.0000   0.0000 
 'International Tables Vol C Tables 4.2.6.8 and 6.1.1.4' 
 'N'  'N'   0.0061   0.0033 
 'International Tables Vol C Tables 4.2.6.8 and 6.1.1.4' 
 'O'  'O'   0.0106   0.0060 
 'International Tables Vol C Tables 4.2.6.8 and 6.1.1.4' 
 'Fe'  'Fe'   0.3463   0.8444 
 'International Tables Vol C Tables 4.2.6.8 and 6.1.1.4' 
 'Tl'  'Tl'  -2.8358   9.6688 
 'International Tables Vol C Tables 4.2.6.8 and 6.1.1.4' 
 
_symmetry_cell_setting           'Monoclinic'
_symmetry_space_group_name_H-M   'P 21/n'
 
loop_ 
 _symmetry_equiv_pos_as_xyz 
 'x, y, z' 
 'x+1/2, -y+1/2, z+1/2' 
 '-x, -y, -z' 
 '-x-1/2, y-1/2, -z-1/2' 
 
_cell_length_a                    13.915(2) 
_cell_length_b                    21.967(4) 
_cell_length_c                    23.476(4) 
_cell_angle_alpha                 90.00 
_cell_angle_beta                  98.499(3) 
_cell_angle_gamma                 90.00 
_cell_volume                      7097(2) 
_cell_formula_units_Z             4 
_cell_measurement_temperature     173(2) 
_cell_measurement_reflns_used     2696
_cell_measurement_theta_min       2.60
_cell_measurement_theta_max       26.22

_exptl_crystal_description       'Plate'
_exptl_crystal_colour            'Green'
_exptl_crystal_size_max           0.45 
_exptl_crystal_size_mid           0.25 
_exptl_crystal_size_min           0.12 
_exptl_crystal_density_meas       ? 
_exptl_crystal_density_diffrn     1.354 
_exptl_crystal_density_method     'not measured' 
_exptl_crystal_F_000              2972 
_exptl_absorpt_coefficient_mu     2.526 
_exptl_absorpt_correction_type    'Multi-scan' 
_exptl_absorpt_correction_T_min   0.471 
_exptl_absorpt_correction_T_max   0.738 
_exptl_absorpt_process_details    'SADABS (Sheldrick, 2003)' 
 
_exptl_special_details     'Dr. D. Klein/Prof. L. Que/ Prof. W. Tolman' 
 
_diffrn_ambient_temperature       173(2) 
_diffrn_radiation_wavelength      0.71073 
_diffrn_radiation_type            MoK\a 
_diffrn_radiation_source         'sealed tube'
_diffrn_radiation_monochromator  'graphite'
_diffrn_measurement_device_type  'CCD area detector'
_diffrn_measurement_method       'phi and omega scans'
_diffrn_detector_area_resol_mean  ? 
_diffrn_standards_number          ? 
_diffrn_standards_interval_count  ? 
_diffrn_standards_interval_time   ? 
_diffrn_standards_decay_%         ? 
_diffrn_reflns_number             14513 
_diffrn_reflns_av_R_equivalents   0.0481 
_diffrn_reflns_av_sigmaI/netI     0.0353 
_diffrn_reflns_limit_h_min        -17 
_diffrn_reflns_limit_h_max        17 
_diffrn_reflns_limit_k_min        0 
_diffrn_reflns_limit_k_max        27 
_diffrn_reflns_limit_l_min        0 
_diffrn_reflns_limit_l_max        29 
_diffrn_reflns_theta_min          1.28 
_diffrn_reflns_theta_max          26.38 
_reflns_number_total              14513 
_reflns_number_gt                 10173 
_reflns_threshold_expression      >2sigma(I) 
 
_computing_data_collection      'Bruker SMART'
_computing_cell_refinement      'Bruker SMART'
_computing_data_reduction       'Bruker SAINT'
_computing_structure_solution   'Bruker SHELXTL'
_computing_structure_refinement 'Bruker SHELXTL'
_computing_molecular_graphics   'Bruker SHELXTL'
_computing_publication_material 'Bruker SHELXTL'
 
_refine_special_details 
; 
 Refinement of F^2^ against ALL reflections.  The weighted R-factor wR and 
 goodness of fit S are based on F^2^, conventional R-factors R are based 
 on F, with F set to zero for negative F^2^. The threshold expression of 
 F^2^ > 2sigma(F^2^) is used only for calculating R-factors(gt) etc. and is 
 not relevant to the choice of reflections for refinement.  R-factors based 
 on F^2^ are statistically about twice as large as those based on F, and R- 
 factors based on ALL data will be even larger. 
; 
 
_refine_ls_structure_factor_coef  Fsqd  
_refine_ls_matrix_type            full 
_refine_ls_weighting_scheme       calc  
_refine_ls_weighting_details 
 'calc w=1/[\s^2^(Fo^2^)+(0.0214P)^2^+9.2336P] where P=(Fo^2^+2Fc^2^)/3' 
_atom_sites_solution_primary      direct 
_atom_sites_solution_secondary    difmap 
_atom_sites_solution_hydrogens    geom 
_refine_ls_hydrogen_treatment     riding 
_refine_ls_extinction_method      none 
_refine_ls_extinction_coef        ? 
_refine_ls_number_reflns          14513 
_refine_ls_number_parameters      838 
_refine_ls_number_restraints      0 
_refine_ls_R_factor_all           0.0621 
_refine_ls_R_factor_gt            0.0296 
_refine_ls_wR_factor_ref          0.0742 
_refine_ls_wR_factor_gt           0.0611 
_refine_ls_goodness_of_fit_ref    1.080 
_refine_ls_restrained_S_all       1.080 
_refine_ls_shift/su_max           0.009 
_refine_ls_shift/su_mean          0.000 
 
loop_ 
 _atom_site_label 
 _atom_site_type_symbol 
 _atom_site_fract_x 
 _atom_site_fract_y 
 _atom_site_fract_z 
 _atom_site_U_iso_or_equiv 
 _atom_site_adp_type 
 _atom_site_occupancy 
 _atom_site_symmetry_multiplicity 
 _atom_site_calc_flag 
 _atom_site_refinement_flags 
 _atom_site_disorder_assembly 
 _atom_site_disorder_group 
Tl1 Tl 0.124818(9) 0.253011(7) 0.164393(5) 0.02999(4) Uani 1 1 d . . . 
Fe1 Fe 0.27191(3) 0.25885(2) 0.026055(19) 0.02314(10) Uani 1 1 d . . . 
N1 N 0.3360(2) 0.26080(12) -0.03219(13) 0.0321(7) Uani 1 1 d . . . 
O1 O 0.3791(2) 0.26402(14) -0.07031(13) 0.0568(8) Uani 1 1 d . . . 
O2 O 0.14225(16) 0.28286(10) -0.00686(10) 0.0298(5) Uani 1 1 d . . . 
C1 C 0.0882(2) 0.31537(14) 0.02180(15) 0.0267(7) Uani 1 1 d . . . 
O3 O 0.10646(18) 0.32559(11) 0.07391(10) 0.0338(6) Uani 1 1 d . . . 
C2 C 0.0000(2) 0.34226(14) -0.01410(14) 0.0254(7) Uani 1 1 d . . . 
C3 C 0.0107(2) 0.37494(15) -0.06409(14) 0.0268(7) Uani 1 1 d . . . 
C4 C -0.0715(3) 0.40115(16) -0.09608(15) 0.0317(8) Uani 1 1 d . . . 
H4A H -0.0652 0.4242 -0.1296 0.038 Uiso 1 1 calc R . . 
C5 C -0.1621(3) 0.39378(16) -0.07942(16) 0.0348(8) Uani 1 1 d . . . 
H5A H -0.2176 0.4113 -0.1019 0.042 Uiso 1 1 calc R . . 
C6 C -0.1724(3) 0.36107(15) -0.03024(16) 0.0327(8) Uani 1 1 d . . . 
H6A H -0.2351 0.3560 -0.0195 0.039 Uiso 1 1 calc R . . 
C7 C -0.0914(2) 0.33549(15) 0.00375(15) 0.0282(8) Uani 1 1 d . . . 
C8 C 0.1079(2) 0.38470(15) -0.08296(14) 0.0268(7) Uani 1 1 d . . . 
C9 C 0.1715(3) 0.42901(15) -0.05622(15) 0.0299(8) Uani 1 1 d . . . 
C10 C 0.2605(3) 0.43744(16) -0.07535(16) 0.0348(9) Uani 1 1 d . . . 
H10A H 0.3039 0.4673 -0.0571 0.042 Uiso 1 1 calc R . . 
C11 C 0.2880(3) 0.40370(18) -0.12007(17) 0.0379(9) Uani 1 1 d . . . 
C12 C 0.2239(3) 0.36017(17) -0.14607(16) 0.0362(9) Uani 1 1 d . . . 
H12A H 0.2418 0.3366 -0.1768 0.043 Uiso 1 1 calc R . . 
C13 C 0.1343(3) 0.35002(16) -0.12848(15) 0.0313(8) Uani 1 1 d . . . 
C14 C 0.1450(3) 0.46602(17) -0.00643(16) 0.0403(9) Uani 1 1 d . . . 
H14A H 0.1962 0.4959 0.0057 0.060 Uiso 1 1 calc R . . 
H14B H 0.1381 0.4389 0.0259 0.060 Uiso 1 1 calc R . . 
H14C H 0.0834 0.4872 -0.0186 0.060 Uiso 1 1 calc R . . 
C15 C 0.3858(3) 0.4130(2) -0.1392(2) 0.0558(12) Uani 1 1 d . . . 
H15A H 0.3897 0.3885 -0.1737 0.084 Uiso 1 1 d R . . 
H15B H 0.4372 0.4005 -0.1083 0.084 Uiso 1 1 d R . . 
H15C H 0.3941 0.4561 -0.1481 0.084 Uiso 1 1 d R . . 
C16 C 0.0691(3) 0.30020(18) -0.15594(17) 0.0441(10) Uani 1 1 d . . . 
H16A H 0.0950 0.2843 -0.1896 0.066 Uiso 1 1 calc R . . 
H16B H 0.0037 0.3165 -0.1680 0.066 Uiso 1 1 calc R . . 
H16C H 0.0660 0.2673 -0.1281 0.066 Uiso 1 1 calc R . . 
C17 C -0.1060(2) 0.30156(15) 0.05712(15) 0.0297(8) Uani 1 1 d . . . 
C18 C -0.1260(3) 0.33400(17) 0.10549(17) 0.0385(9) Uani 1 1 d . . . 
C19 C -0.1398(3) 0.30245(18) 0.15477(17) 0.0411(9) Uani 1 1 d . . . 
H19A H -0.1539 0.3246 0.1873 0.049 Uiso 1 1 calc R . . 
C20 C -0.1338(3) 0.23953(17) 0.15797(17) 0.0388(9) Uani 1 1 d . . . 
C21 C -0.1142(3) 0.20841(17) 0.10997(17) 0.0372(9) Uani 1 1 d . . . 
H21A H -0.1101 0.1653 0.1116 0.045 Uiso 1 1 calc R . . 
C22 C -0.1003(2) 0.23768(15) 0.05906(16) 0.0312(8) Uani 1 1 d . . . 
C23 C -0.1308(4) 0.40246(19) 0.10484(19) 0.0618(14) Uani 1 1 d . . . 
H23A H -0.1337 0.4174 0.1439 0.093 Uiso 1 1 calc R . . 
H23B H -0.1890 0.4157 0.0791 0.093 Uiso 1 1 calc R . . 
H23C H -0.0728 0.4189 0.0911 0.093 Uiso 1 1 calc R . . 
C24 C -0.1469(3) 0.2072(2) 0.21338(18) 0.0529(11) Uani 1 1 d . . . 
H24A H -0.2041 0.2236 0.2279 0.079 Uiso 1 1 calc R . . 
H24B H -0.0892 0.2135 0.2421 0.079 Uiso 1 1 calc R . . 
H24C H -0.1559 0.1635 0.2059 0.079 Uiso 1 1 calc R . . 
C25 C -0.0800(3) 0.20100(17) 0.00785(17) 0.0415(9) Uani 1 1 d . . . 
H25A H -0.1032 0.1592 0.0112 0.062 Uiso 1 1 calc R . . 
H25B H -0.0099 0.2006 0.0066 0.062 Uiso 1 1 calc R . . 
H25C H -0.1138 0.2194 -0.0276 0.062 Uiso 1 1 calc R . . 
O4 O 0.33927(17) 0.31796(10) 0.07830(10) 0.0295(5) Uani 1 1 d . . . 
C26 C 0.3511(2) 0.31053(15) 0.13333(15) 0.0256(7) Uani 1 1 d . . . 
O5 O 0.31240(17) 0.27054(10) 0.15872(10) 0.0319(6) Uani 1 1 d . . . 
C27 C 0.4191(2) 0.35646(14) 0.16601(14) 0.0267(7) Uani 1 1 d . . . 
C28 C 0.5109(2) 0.36661(15) 0.14968(15) 0.0283(8) Uani 1 1 d . . . 
C29 C 0.5713(3) 0.41004(17) 0.17971(17) 0.0400(9) Uani 1 1 d . . . 
H29A H 0.6341 0.4170 0.1697 0.048 Uiso 1 1 calc R . . 
C30 C 0.5413(3) 0.44301(18) 0.22369(18) 0.0466(11) Uani 1 1 d . . . 
H30A H 0.5822 0.4737 0.2427 0.056 Uiso 1 1 calc R . . 
C31 C 0.4519(3) 0.43170(17) 0.24030(17) 0.0426(10) Uani 1 1 d . . . 
H31A H 0.4326 0.4542 0.2713 0.051 Uiso 1 1 calc R . . 
C32 C 0.3898(3) 0.38804(15) 0.21250(15) 0.0305(8) Uani 1 1 d . . . 
C33 C 0.5462(2) 0.33004(16) 0.10304(15) 0.0287(8) Uani 1 1 d . . . 
C34 C 0.5792(3) 0.27080(16) 0.11450(15) 0.0314(8) Uani 1 1 d . . . 
C35 C 0.6110(3) 0.23690(17) 0.07064(17) 0.0377(9) Uani 1 1 d . . . 
H35A H 0.6341 0.1966 0.0786 0.045 Uiso 1 1 calc R . . 
C36 C 0.6099(3) 0.26055(17) 0.01554(16) 0.0386(9) Uani 1 1 d . . . 
C37 C 0.5776(3) 0.31943(17) 0.00556(16) 0.0374(9) Uani 1 1 d . . . 
H37A H 0.5768 0.3363 -0.0318 0.045 Uiso 1 1 calc R . . 
C38 C 0.5463(3) 0.35496(16) 0.04807(16) 0.0326(8) Uani 1 1 d . . . 
C39 C 0.5808(3) 0.24238(17) 0.17338(16) 0.0444(9) Uani 1 1 d . . . 
H39A H 0.6094 0.2016 0.1736 0.067 Uiso 1 1 calc R . . 
H39B H 0.5143 0.2394 0.1822 0.067 Uiso 1 1 calc R . . 
H39C H 0.6197 0.2677 0.2024 0.067 Uiso 1 1 calc R . . 
C40 C 0.6428(3) 0.2222(2) -0.03142(19) 0.0549(12) Uani 1 1 d . . . 
H40A H 0.6616 0.1817 -0.0162 0.082 Uiso 1 1 calc R . . 
H40B H 0.6987 0.2416 -0.0450 0.082 Uiso 1 1 calc R . . 
H40C H 0.5896 0.2183 -0.0635 0.082 Uiso 1 1 calc R . . 
C41 C 0.5081(3) 0.41862(18) 0.03397(18) 0.0497(11) Uani 1 1 d . . . 
H41A H 0.5162 0.4288 -0.0057 0.075 Uiso 1 1 calc R . . 
H41B H 0.5444 0.4478 0.0605 0.075 Uiso 1 1 calc R . . 
H41C H 0.4391 0.4204 0.0380 0.075 Uiso 1 1 calc R . . 
C42 C 0.2948(3) 0.37728(15) 0.23327(15) 0.0280(8) Uani 1 1 d . . . 
C43 C 0.2903(3) 0.33857(15) 0.28034(15) 0.0311(8) Uani 1 1 d . . . 
C44 C 0.2035(3) 0.33200(16) 0.30162(15) 0.0342(8) Uani 1 1 d . . . 
H44A H 0.2018 0.3068 0.3344 0.041 Uiso 1 1 calc R . . 
C45 C 0.1185(3) 0.36084(17) 0.27690(17) 0.0383(9) Uani 1 1 d . . . 
C46 C 0.1240(3) 0.39778(17) 0.22971(17) 0.0399(9) Uani 1 1 d . . . 
H46A H 0.0667 0.4177 0.2119 0.048 Uiso 1 1 calc R . . 
C47 C 0.2099(3) 0.40676(16) 0.20741(16) 0.0352(9) Uani 1 1 d . . . 
C48 C 0.3800(3) 0.30495(19) 0.30819(19) 0.0493(11) Uani 1 1 d . . . 
H48A H 0.3628 0.2779 0.3383 0.074 Uiso 1 1 calc R . . 
H48B H 0.4289 0.3344 0.3253 0.074 Uiso 1 1 calc R . . 
H48C H 0.4065 0.2808 0.2790 0.074 Uiso 1 1 calc R . . 
C49 C 0.0251(3) 0.3523(2) 0.3009(2) 0.0582(12) Uani 1 1 d . . . 
H49A H 0.0281 0.3143 0.3229 0.087 Uiso 1 1 calc R . . 
H49B H -0.0292 0.3504 0.2692 0.087 Uiso 1 1 calc R . . 
H49C H 0.0155 0.3866 0.3261 0.087 Uiso 1 1 calc R . . 
C50 C 0.2128(3) 0.4496(2) 0.15735(18) 0.0530(12) Uani 1 1 d . . . 
H50A H 0.2418 0.4287 0.1271 0.079 Uiso 1 1 calc R . . 
H50B H 0.2519 0.4854 0.1704 0.079 Uiso 1 1 calc R . . 
H50C H 0.1466 0.4624 0.1420 0.079 Uiso 1 1 calc R . . 
O6 O 0.28280(17) 0.17550(10) 0.05255(10) 0.0292(5) Uani 1 1 d . . . 
C51 C 0.2142(3) 0.14690(14) 0.07230(13) 0.0265(7) Uani 1 1 d . . . 
O7 O 0.14017(18) 0.17031(10) 0.08509(10) 0.0324(6) Uani 1 1 d . . . 
C52 C 0.2307(3) 0.07905(14) 0.07893(14) 0.0276(8) Uani 1 1 d . . . 
C53 C 0.2501(3) 0.04546(15) 0.03109(15) 0.0319(8) Uani 1 1 d . . . 
C54 C 0.2664(3) -0.01706(16) 0.03795(16) 0.0461(11) Uani 1 1 d . . . 
H54A H 0.2787 -0.0407 0.0059 0.055 Uiso 1 1 calc R . . 
C55 C 0.2650(4) -0.04515(18) 0.09033(18) 0.0590(14) Uani 1 1 d . . . 
H55A H 0.2776 -0.0876 0.0944 0.071 Uiso 1 1 calc R . . 
C56 C 0.2450(3) -0.01123(17) 0.13729(16) 0.0472(11) Uani 1 1 d . . . 
H56A H 0.2444 -0.0307 0.1734 0.057 Uiso 1 1 calc R . . 
C57 C 0.2258(3) 0.05105(16) 0.13185(15) 0.0331(8) Uani 1 1 d . . . 
C58 C 0.2470(3) 0.07435(14) -0.02663(14) 0.0266(7) Uani 1 1 d . . . 
C59 C 0.1565(3) 0.08340(15) -0.06104(15) 0.0309(8) Uani 1 1 d . . . 
C60 C 0.1538(3) 0.11117(17) -0.11444(15) 0.0379(9) Uani 1 1 d . . . 
H60A H 0.0928 0.1172 -0.1378 0.045 Uiso 1 1 calc R . . 
C61 C 0.2370(3) 0.13031(17) -0.13463(16) 0.0384(10) Uani 1 1 d . . . 
C62 C 0.3256(3) 0.12115(16) -0.09964(16) 0.0360(9) Uani 1 1 d . . . 
H62A H 0.3835 0.1344 -0.1128 0.043 Uiso 1 1 calc R . . 
C63 C 0.3324(3) 0.09334(15) -0.04599(15) 0.0309(8) Uani 1 1 d . . . 
C64 C 0.0635(3) 0.0630(2) -0.04063(18) 0.0475(11) Uani 1 1 d . . . 
H64A H 0.0080 0.0731 -0.0699 0.071 Uiso 1 1 calc R . . 
H64B H 0.0565 0.0839 -0.0046 0.071 Uiso 1 1 calc R . . 
H64C H 0.0656 0.0189 -0.0342 0.071 Uiso 1 1 calc R . . 
C65 C 0.2327(4) 0.1616(2) -0.19245(18) 0.0624(14) Uani 1 1 d . . . 
H65A H 0.1646 0.1668 -0.2098 0.094 Uiso 1 1 calc R . . 
H65B H 0.2665 0.1367 -0.2179 0.094 Uiso 1 1 calc R . . 
H65C H 0.2640 0.2016 -0.1871 0.094 Uiso 1 1 calc R . . 
C66 C 0.4297(3) 0.0870(2) -0.00888(18) 0.0471(10) Uani 1 1 d . . . 
H66A H 0.4814 0.0936 -0.0324 0.071 Uiso 1 1 calc R . . 
H66B H 0.4358 0.0461 0.0079 0.071 Uiso 1 1 calc R . . 
H66C H 0.4353 0.1174 0.0221 0.071 Uiso 1 1 calc R . . 
C67 C 0.1991(3) 0.08490(15) 0.18267(14) 0.0283(8) Uani 1 1 d . . . 
C68 C 0.1031(3) 0.08268(15) 0.19358(14) 0.0302(8) Uani 1 1 d . . . 
C69 C 0.0792(3) 0.10975(16) 0.24326(15) 0.0324(8) Uani 1 1 d . . . 
H69A H 0.0144 0.1068 0.2513 0.039 Uiso 1 1 calc R . . 
C70 C 0.1481(3) 0.14096(16) 0.28129(15) 0.0321(8) Uani 1 1 d . . . 
C71 C 0.2416(3) 0.14457(17) 0.26892(15) 0.0354(9) Uani 1 1 d . . . 
H71A H 0.2890 0.1664 0.2942 0.042 Uiso 1 1 calc R . . 
C72 C 0.2687(3) 0.11690(16) 0.22009(15) 0.0329(9) Uani 1 1 d . . . 
C73 C 0.0247(3) 0.05285(18) 0.15119(16) 0.0416(10) Uani 1 1 d . . . 
H73A H 0.0433 0.0107 0.1444 0.062 Uiso 1 1 calc R . . 
H73B H 0.0167 0.0754 0.1148 0.062 Uiso 1 1 calc R . . 
H73C H -0.0367 0.0531 0.1669 0.062 Uiso 1 1 calc R . . 
C74 C 0.1206(3) 0.1700(2) 0.33494(16) 0.0472(10) Uani 1 1 d . . . 
H74A H 0.0670 0.1987 0.3242 0.071 Uiso 1 1 calc R . . 
H74B H 0.1767 0.1919 0.3554 0.071 Uiso 1 1 calc R . . 
H74C H 0.1002 0.1384 0.3601 0.071 Uiso 1 1 calc R . . 
C75 C 0.3724(3) 0.1219(2) 0.20860(19) 0.0513(11) Uani 1 1 d . . . 
H75A H 0.4126 0.1403 0.2420 0.077 Uiso 1 1 calc R . . 
H75B H 0.3747 0.1474 0.1746 0.077 Uiso 1 1 calc R . . 
H75C H 0.3974 0.0812 0.2018 0.077 Uiso 1 1 calc R . . 
C76 C 0.6275(4) 0.0426(3) 0.2121(2) 0.0761(16) Uani 1 1 d . . . 
H76A H 0.6100 0.0861 0.2182 0.091 Uiso 1 1 calc R . . 
C77 C 0.7287(4) 0.0420(3) 0.1985(3) 0.0801(17) Uani 1 1 d . . . 
H77A H 0.7569 0.0007 0.2045 0.096 Uiso 1 1 calc R . . 
H77B H 0.7698 0.0708 0.2238 0.096 Uiso 1 1 calc R . . 
C78 C 0.7231(4) 0.0613(3) 0.1345(2) 0.0733(15) Uani 1 1 d . . . 
H78A H 0.7446 0.1040 0.1316 0.088 Uiso 1 1 calc R . . 
H78B H 0.7648 0.0347 0.1143 0.088 Uiso 1 1 calc R . . 
C79 C 0.6192(4) 0.0545(2) 0.1091(2) 0.0639(13) Uani 1 1 d . . . 
H79A H 0.6129 0.0295 0.0737 0.077 Uiso 1 1 calc R . . 
H79B H 0.5893 0.0948 0.0995 0.077 Uiso 1 1 calc R . . 
C80 C 0.5696(4) 0.0224(3) 0.1561(2) 0.0699(15) Uani 1 1 d . . . 
H80A H 0.5009 0.0352 0.1536 0.084 Uiso 1 1 calc R . . 
H80B H 0.5721 -0.0224 0.1520 0.084 Uiso 1 1 calc R . . 
C81 C 0.6093(6) 0.0074(3) 0.2647(2) 0.131(3) Uani 1 1 d . . . 
H81A H 0.6458 -0.0309 0.2668 0.196 Uiso 1 1 calc R . . 
H81B H 0.5398 -0.0014 0.2622 0.196 Uiso 1 1 calc R . . 
H81C H 0.6307 0.0316 0.2993 0.196 Uiso 1 1 calc R . . 
 
loop_ 
 _atom_site_aniso_label 
 _atom_site_aniso_U_11 
 _atom_site_aniso_U_22 
 _atom_site_aniso_U_33 
 _atom_site_aniso_U_23 
 _atom_site_aniso_U_13 
 _atom_site_aniso_U_12 
Tl1 0.03217(7) 0.03394(7) 0.02519(7) -0.00077(7) 0.00861(5) -0.00055(7) 
Fe1 0.0242(2) 0.0221(2) 0.0228(2) -0.00050(19) 0.00216(18) 0.00006(19) 
N1 0.0318(16) 0.0312(17) 0.0335(16) 0.0008(13) 0.0051(13) -0.0006(13) 
O1 0.062(2) 0.069(2) 0.0466(17) 0.0021(15) 0.0311(16) -0.0041(16) 
O2 0.0277(13) 0.0293(13) 0.0314(13) 0.0021(10) 0.0012(11) 0.0010(10) 
C1 0.0288(19) 0.0210(16) 0.030(2) 0.0069(14) 0.0021(15) -0.0031(14) 
O3 0.0376(15) 0.0387(14) 0.0236(14) 0.0039(11) -0.0004(11) 0.0005(11) 
C2 0.0258(18) 0.0236(17) 0.0257(18) -0.0013(14) 0.0005(14) 0.0028(13) 
C3 0.0302(19) 0.0269(17) 0.0226(17) -0.0019(14) 0.0017(14) 0.0008(14) 
C4 0.034(2) 0.0345(19) 0.0261(19) 0.0059(15) 0.0031(16) 0.0032(16) 
C5 0.030(2) 0.038(2) 0.034(2) 0.0009(16) -0.0047(16) 0.0086(16) 
C6 0.028(2) 0.0324(19) 0.038(2) -0.0047(16) 0.0048(16) 0.0012(15) 
C7 0.0284(19) 0.0257(17) 0.0305(19) -0.0009(14) 0.0042(15) -0.0005(14) 
C8 0.0300(19) 0.0266(17) 0.0234(18) 0.0045(14) 0.0025(15) 0.0020(14) 
C9 0.039(2) 0.0239(17) 0.0270(19) 0.0026(14) 0.0038(16) 0.0015(15) 
C10 0.037(2) 0.0319(19) 0.035(2) 0.0041(16) 0.0023(17) -0.0059(16) 
C11 0.034(2) 0.042(2) 0.039(2) 0.0106(18) 0.0094(18) 0.0032(17) 
C12 0.042(2) 0.038(2) 0.030(2) -0.0014(16) 0.0109(18) 0.0040(17) 
C13 0.038(2) 0.0319(19) 0.0231(18) -0.0004(15) 0.0021(16) 0.0014(16) 
C14 0.052(3) 0.033(2) 0.038(2) -0.0077(17) 0.0122(19) -0.0063(18) 
C15 0.042(3) 0.067(3) 0.063(3) 0.003(2) 0.022(2) -0.002(2) 
C16 0.049(3) 0.046(2) 0.038(2) -0.0129(18) 0.0056(19) -0.0060(19) 
C17 0.0264(19) 0.0302(19) 0.032(2) 0.0054(15) 0.0043(15) 0.0001(15) 
C18 0.045(2) 0.034(2) 0.038(2) 0.0032(17) 0.0092(18) 0.0037(17) 
C19 0.046(2) 0.046(2) 0.035(2) 0.0033(18) 0.0158(19) 0.0082(19) 
C20 0.0278(19) 0.048(3) 0.042(2) 0.0157(18) 0.0077(16) 0.0007(17) 
C21 0.028(2) 0.030(2) 0.053(3) 0.0073(18) 0.0057(18) -0.0028(15) 
C22 0.0216(17) 0.033(2) 0.039(2) 0.0010(15) 0.0045(15) -0.0013(14) 
C23 0.107(4) 0.040(2) 0.042(3) -0.001(2) 0.026(3) 0.009(3) 
C24 0.057(3) 0.055(3) 0.050(3) 0.018(2) 0.019(2) 0.003(2) 
C25 0.043(2) 0.035(2) 0.046(2) -0.0038(18) 0.0080(19) 0.0005(18) 
O4 0.0290(13) 0.0335(13) 0.0252(13) -0.0036(10) 0.0012(10) -0.0033(10) 
C26 0.0215(17) 0.0255(17) 0.0301(19) -0.0040(14) 0.0044(15) 0.0043(14) 
O5 0.0318(14) 0.0295(13) 0.0345(14) -0.0031(10) 0.0054(11) -0.0057(10) 
C27 0.0284(19) 0.0254(17) 0.0247(18) 0.0006(14) -0.0015(14) -0.0019(14) 
C28 0.0291(19) 0.0277(18) 0.0275(18) 0.0014(14) 0.0020(15) -0.0033(14) 
C29 0.035(2) 0.043(2) 0.042(2) -0.0045(18) 0.0041(18) -0.0136(17) 
C30 0.049(3) 0.042(2) 0.048(3) -0.0173(19) 0.003(2) -0.0193(19) 
C31 0.048(3) 0.041(2) 0.039(2) -0.0155(18) 0.0066(19) -0.0068(19) 
C32 0.032(2) 0.0301(19) 0.0284(19) -0.0022(15) 0.0026(16) 0.0008(15) 
C33 0.0193(17) 0.0353(19) 0.0318(19) -0.0003(15) 0.0051(15) -0.0050(14) 
C34 0.0262(18) 0.0373(19) 0.0302(19) 0.0013(15) 0.0028(15) -0.0024(15) 
C35 0.032(2) 0.035(2) 0.046(2) -0.0016(16) 0.0046(17) 0.0033(15) 
C36 0.0292(19) 0.048(2) 0.040(2) -0.0053(18) 0.0106(16) -0.0046(17) 
C37 0.035(2) 0.047(2) 0.031(2) 0.0062(17) 0.0087(17) -0.0042(17) 
C38 0.0262(19) 0.036(2) 0.036(2) 0.0046(16) 0.0057(16) -0.0060(15) 
C39 0.056(2) 0.041(2) 0.036(2) 0.0078(18) 0.0065(18) 0.008(2) 
C40 0.058(3) 0.061(3) 0.051(3) -0.012(2) 0.025(2) 0.003(2) 
C41 0.061(3) 0.043(2) 0.047(3) 0.014(2) 0.013(2) 0.005(2) 
C42 0.033(2) 0.0264(17) 0.0251(19) -0.0085(14) 0.0060(16) 0.0014(15) 
C43 0.034(2) 0.0301(18) 0.0273(19) -0.0031(15) 0.0004(16) 0.0018(15) 
C44 0.043(2) 0.033(2) 0.0265(19) -0.0020(15) 0.0067(17) -0.0039(17) 
C45 0.038(2) 0.042(2) 0.037(2) -0.0081(18) 0.0132(18) 0.0063(18) 
C46 0.037(2) 0.042(2) 0.040(2) -0.0017(18) 0.0055(19) 0.0142(18) 
C47 0.043(2) 0.034(2) 0.029(2) -0.0027(16) 0.0056(18) 0.0080(17) 
C48 0.045(3) 0.051(3) 0.050(3) 0.008(2) 0.001(2) 0.003(2) 
C49 0.045(3) 0.075(3) 0.060(3) 0.003(2) 0.023(2) 0.010(2) 
C50 0.060(3) 0.056(3) 0.044(3) 0.020(2) 0.012(2) 0.017(2) 
O6 0.0350(14) 0.0230(12) 0.0292(13) 0.0008(10) 0.0035(11) 0.0016(10) 
C51 0.039(2) 0.0240(17) 0.0153(16) 0.0002(13) 0.0010(15) 0.0015(15) 
O7 0.0393(15) 0.0282(13) 0.0303(14) -0.0001(10) 0.0070(12) 0.0058(11) 
C52 0.039(2) 0.0205(16) 0.0232(18) 0.0000(13) 0.0046(15) 0.0013(14) 
C53 0.047(2) 0.0246(17) 0.0246(18) 0.0007(14) 0.0073(17) 0.0038(16) 
C54 0.085(3) 0.0263(19) 0.031(2) -0.0009(16) 0.022(2) 0.011(2) 
C55 0.117(4) 0.023(2) 0.042(3) 0.0088(18) 0.027(3) 0.017(2) 
C56 0.088(3) 0.031(2) 0.027(2) 0.0105(16) 0.021(2) 0.013(2) 
C57 0.049(2) 0.0295(18) 0.0220(18) 0.0030(15) 0.0084(17) 0.0062(16) 
C58 0.038(2) 0.0199(16) 0.0231(18) -0.0043(13) 0.0080(15) 0.0015(14) 
C59 0.037(2) 0.0295(19) 0.0270(19) -0.0068(15) 0.0077(16) 0.0005(16) 
C60 0.046(2) 0.042(2) 0.0238(19) -0.0009(16) -0.0012(17) 0.0092(18) 
C61 0.060(3) 0.034(2) 0.0219(19) 0.0038(16) 0.0100(19) 0.0084(19) 
C62 0.047(2) 0.034(2) 0.032(2) -0.0012(16) 0.0194(18) -0.0025(17) 
C63 0.037(2) 0.0276(18) 0.0285(19) -0.0039(15) 0.0073(16) 0.0062(15) 
C64 0.045(3) 0.058(3) 0.041(2) -0.011(2) 0.011(2) -0.011(2) 
C65 0.095(4) 0.062(3) 0.032(2) 0.015(2) 0.017(2) 0.012(3) 
C66 0.039(2) 0.057(3) 0.045(2) -0.003(2) 0.006(2) 0.008(2) 
C67 0.043(2) 0.0259(17) 0.0163(17) 0.0051(14) 0.0059(16) 0.0051(15) 
C68 0.043(2) 0.0264(18) 0.0204(18) 0.0045(14) 0.0022(16) -0.0011(15) 
C69 0.034(2) 0.034(2) 0.030(2) 0.0045(16) 0.0084(16) -0.0019(16) 
C70 0.042(2) 0.0337(19) 0.0213(18) 0.0016(15) 0.0080(17) 0.0030(16) 
C71 0.040(2) 0.042(2) 0.0220(19) -0.0025(16) -0.0020(17) -0.0032(17) 
C72 0.037(2) 0.038(2) 0.0232(19) 0.0054(15) 0.0014(16) 0.0028(16) 
C73 0.051(3) 0.040(2) 0.032(2) 0.0004(17) 0.0009(19) -0.0105(19) 
C74 0.055(3) 0.058(3) 0.029(2) -0.0074(19) 0.011(2) 0.002(2) 
C75 0.041(3) 0.073(3) 0.041(3) -0.002(2) 0.008(2) 0.006(2) 
C76 0.092(4) 0.066(3) 0.068(4) 0.000(3) 0.004(3) -0.011(3) 
C77 0.062(4) 0.081(4) 0.088(4) 0.001(3) -0.018(3) -0.011(3) 
C78 0.062(3) 0.084(4) 0.076(4) -0.021(3) 0.016(3) -0.016(3) 
C79 0.072(4) 0.057(3) 0.061(3) -0.011(2) 0.004(3) -0.002(3) 
C80 0.056(3) 0.082(4) 0.074(4) -0.013(3) 0.014(3) 0.000(3) 
C81 0.235(9) 0.089(5) 0.061(4) 0.010(3) -0.001(5) -0.092(5) 
 
_geom_special_details 
; 
 All esds (except the esd in the dihedral angle between two l.s. planes) 
 are estimated using the full covariance matrix.  The cell esds are taken 
 into account individually in the estimation of esds in distances, angles 
 and torsion angles; correlations between esds in cell parameters are only 
 used when they are defined by crystal symmetry.  An approximate (isotropic) 
 treatment of cell esds is used for estimating esds involving l.s. planes. 
; 
 
loop_ 
 _geom_bond_atom_site_label_1 
 _geom_bond_atom_site_label_2 
 _geom_bond_distance 
 _geom_bond_site_symmetry_2 
 _geom_bond_publ_flag 
Tl1 O7 2.632(2) . ? 
Tl1 O3 2.638(2) . ? 
Tl1 O5 2.661(2) . ? 
Fe1 N1 1.740(3) . ? 
Fe1 O2 1.928(2) . ? 
Fe1 O4 1.931(2) . ? 
Fe1 O6 1.932(2) . ? 
N1 O1 1.151(4) . ? 
O2 C1 1.295(4) . ? 
C1 O3 1.233(4) . ? 
C1 C2 1.504(4) . ? 
C2 C3 1.402(5) . ? 
C2 C7 1.405(5) . ? 
C3 C4 1.396(5) . ? 
C3 C8 1.499(5) . ? 
C4 C5 1.383(5) . ? 
C4 H4A 0.9500 . ? 
C5 C6 1.385(5) . ? 
C5 H5A 0.9500 . ? 
C6 C7 1.399(5) . ? 
C6 H6A 0.9500 . ? 
C7 C17 1.497(5) . ? 
C8 C9 1.400(5) . ? 
C8 C13 1.405(5) . ? 
C9 C10 1.391(5) . ? 
C9 C14 1.514(5) . ? 
C10 C11 1.384(5) . ? 
C10 H10A 0.9500 . ? 
C11 C12 1.386(5) . ? 
C11 C15 1.510(5) . ? 
C12 C13 1.387(5) . ? 
C12 H12A 0.9500 . ? 
C13 C16 1.505(5) . ? 
C14 H14A 0.9800 . ? 
C14 H14B 0.9800 . ? 
C14 H14C 0.9800 . ? 
C15 H15A 0.9800 . ? 
C15 H15B 0.9800 . ? 
C15 H15C 0.9800 . ? 
C16 H16A 0.9800 . ? 
C16 H16B 0.9800 . ? 
C16 H16C 0.9800 . ? 
C17 C18 1.403(5) . ? 
C17 C22 1.406(5) . ? 
C18 C19 1.386(5) . ? 
C18 C23 1.505(5) . ? 
C19 C20 1.386(5) . ? 
C19 H19A 0.9500 . ? 
C20 C21 1.379(5) . ? 
C20 C24 1.517(5) . ? 
C21 C22 1.395(5) . ? 
C21 H21A 0.9500 . ? 
C22 C25 1.508(5) . ? 
C23 H23A 0.9800 . ? 
C23 H23B 0.9800 . ? 
C23 H23C 0.9800 . ? 
C24 H24A 0.9800 . ? 
C24 H24B 0.9800 . ? 
C24 H24C 0.9800 . ? 
C25 H25A 0.9800 . ? 
C25 H25B 0.9800 . ? 
C25 H25C 0.9800 . ? 
O4 C26 1.288(4) . ? 
C26 O5 1.230(4) . ? 
C26 C27 1.512(4) . ? 
C27 C32 1.404(5) . ? 
C27 C28 1.404(5) . ? 
C28 C29 1.393(5) . ? 
C28 C33 1.498(5) . ? 
C29 C30 1.376(5) . ? 
C29 H29A 0.9500 . ? 
C30 C31 1.379(6) . ? 
C30 H30A 0.9500 . ? 
C31 C32 1.388(5) . ? 
C31 H31A 0.9500 . ? 
C32 C42 1.493(5) . ? 
C33 C34 1.393(5) . ? 
C33 C38 1.402(5) . ? 
C34 C35 1.395(5) . ? 
C34 C39 1.514(5) . ? 
C35 C36 1.392(5) . ? 
C35 H35A 0.9500 . ? 
C36 C37 1.378(5) . ? 
C36 C40 1.512(5) . ? 
C37 C38 1.387(5) . ? 
C37 H37A 0.9500 . ? 
C38 C41 1.515(5) . ? 
C39 H39A 0.9800 . ? 
C39 H39B 0.9800 . ? 
C39 H39C 0.9800 . ? 
C40 H40A 0.9800 . ? 
C40 H40B 0.9800 . ? 
C40 H40C 0.9800 . ? 
C41 H41A 0.9800 . ? 
C41 H41B 0.9800 . ? 
C41 H41C 0.9800 . ? 
C42 C43 1.403(5) . ? 
C42 C47 1.404(5) . ? 
C43 C44 1.382(5) . ? 
C43 C48 1.513(5) . ? 
C44 C45 1.391(5) . ? 
C44 H44A 0.9500 . ? 
C45 C46 1.384(5) . ? 
C45 C49 1.502(5) . ? 
C46 C47 1.389(5) . ? 
C46 H46A 0.9500 . ? 
C47 C50 1.510(5) . ? 
C48 H48A 0.9800 . ? 
C48 H48B 0.9800 . ? 
C48 H48C 0.9800 . ? 
C49 H49A 0.9800 . ? 
C49 H49B 0.9800 . ? 
C49 H49C 0.9800 . ? 
C50 H50A 0.9800 . ? 
C50 H50B 0.9800 . ? 
C50 H50C 0.9800 . ? 
O6 C51 1.285(4) . ? 
C51 O7 1.228(4) . ? 
C51 C52 1.512(4) . ? 
C52 C57 1.397(5) . ? 
C52 C53 1.403(5) . ? 
C53 C54 1.398(5) . ? 
C53 C58 1.491(5) . ? 
C54 C55 1.379(5) . ? 
C54 H54A 0.9500 . ? 
C55 C56 1.392(5) . ? 
C55 H55A 0.9500 . ? 
C56 C57 1.396(5) . ? 
C56 H56A 0.9500 . ? 
C57 C67 1.499(5) . ? 
C58 C63 1.396(5) . ? 
C58 C59 1.406(5) . ? 
C59 C60 1.390(5) . ? 
C59 C64 1.513(5) . ? 
C60 C61 1.380(5) . ? 
C60 H60A 0.9500 . ? 
C61 C62 1.392(5) . ? 
C61 C65 1.515(5) . ? 
C62 C63 1.390(5) . ? 
C62 H62A 0.9500 . ? 
C63 C66 1.505(5) . ? 
C64 H64A 0.9800 . ? 
C64 H64B 0.9800 . ? 
C64 H64C 0.9800 . ? 
C65 H65A 0.9800 . ? 
C65 H65B 0.9800 . ? 
C65 H65C 0.9800 . ? 
C66 H66A 0.9800 . ? 
C66 H66B 0.9800 . ? 
C66 H66C 0.9800 . ? 
C67 C68 1.397(5) . ? 
C67 C72 1.398(5) . ? 
C68 C69 1.393(5) . ? 
C68 C73 1.512(5) . ? 
C69 C70 1.391(5) . ? 
C69 H69A 0.9500 . ? 
C70 C71 1.377(5) . ? 
C70 C74 1.511(5) . ? 
C71 C72 1.398(5) . ? 
C71 H71A 0.9500 . ? 
C72 C75 1.511(5) . ? 
C73 H73A 0.9800 . ? 
C73 H73B 0.9800 . ? 
C73 H73C 0.9800 . ? 
C74 H74A 0.9800 . ? 
C74 H74B 0.9800 . ? 
C74 H74C 0.9800 . ? 
C75 H75A 0.9800 . ? 
C75 H75B 0.9800 . ? 
C75 H75C 0.9800 . ? 
C76 C77 1.489(8) . ? 
C76 C80 1.503(7) . ? 
C76 C81 1.511(7) . ? 
C76 H76A 1.0000 . ? 
C77 C78 1.553(7) . ? 
C77 H77A 0.9900 . ? 
C77 H77B 0.9900 . ? 
C78 C79 1.488(7) . ? 
C78 H78A 0.9900 . ? 
C78 H78B 0.9900 . ? 
C79 C80 1.553(7) . ? 
C79 H79A 0.9900 . ? 
C79 H79B 0.9900 . ? 
C80 H80A 0.9900 . ? 
C80 H80B 0.9900 . ? 
C81 H81A 0.9800 . ? 
C81 H81B 0.9800 . ? 
C81 H81C 0.9800 . ? 
 
loop_ 
 _geom_angle_atom_site_label_1 
 _geom_angle_atom_site_label_2 
 _geom_angle_atom_site_label_3 
 _geom_angle 
 _geom_angle_site_symmetry_1 
 _geom_angle_site_symmetry_3 
 _geom_angle_publ_flag 
O7 Tl1 O3 81.72(7) . . ? 
O7 Tl1 O5 83.21(7) . . ? 
O3 Tl1 O5 81.45(7) . . ? 
N1 Fe1 O2 103.68(12) . . ? 
N1 Fe1 O4 103.02(12) . . ? 
O2 Fe1 O4 114.08(10) . . ? 
N1 Fe1 O6 104.56(12) . . ? 
O2 Fe1 O6 114.36(10) . . ? 
O4 Fe1 O6 115.16(10) . . ? 
O1 N1 Fe1 177.8(3) . . ? 
C1 O2 Fe1 121.5(2) . . ? 
O3 C1 O2 124.5(3) . . ? 
O3 C1 C2 121.0(3) . . ? 
O2 C1 C2 114.5(3) . . ? 
C1 O3 Tl1 132.1(2) . . ? 
C3 C2 C7 121.1(3) . . ? 
C3 C2 C1 119.4(3) . . ? 
C7 C2 C1 119.5(3) . . ? 
C4 C3 C2 118.8(3) . . ? 
C4 C3 C8 119.0(3) . . ? 
C2 C3 C8 122.2(3) . . ? 
C5 C4 C3 120.5(3) . . ? 
C5 C4 H4A 119.7 . . ? 
C3 C4 H4A 119.7 . . ? 
C4 C5 C6 120.5(3) . . ? 
C4 C5 H5A 119.7 . . ? 
C6 C5 H5A 119.7 . . ? 
C5 C6 C7 120.6(3) . . ? 
C5 C6 H6A 119.7 . . ? 
C7 C6 H6A 119.7 . . ? 
C6 C7 C2 118.4(3) . . ? 
C6 C7 C17 118.7(3) . . ? 
C2 C7 C17 122.9(3) . . ? 
C9 C8 C13 119.9(3) . . ? 
C9 C8 C3 120.3(3) . . ? 
C13 C8 C3 119.8(3) . . ? 
C10 C9 C8 118.8(3) . . ? 
C10 C9 C14 120.5(3) . . ? 
C8 C9 C14 120.6(3) . . ? 
C11 C10 C9 122.2(3) . . ? 
C11 C10 H10A 118.9 . . ? 
C9 C10 H10A 118.9 . . ? 
C10 C11 C12 118.1(3) . . ? 
C10 C11 C15 121.0(4) . . ? 
C12 C11 C15 120.8(4) . . ? 
C11 C12 C13 121.8(4) . . ? 
C11 C12 H12A 119.1 . . ? 
C13 C12 H12A 119.1 . . ? 
C12 C13 C8 119.1(3) . . ? 
C12 C13 C16 120.1(3) . . ? 
C8 C13 C16 120.7(3) . . ? 
C9 C14 H14A 109.5 . . ? 
C9 C14 H14B 109.5 . . ? 
H14A C14 H14B 109.5 . . ? 
C9 C14 H14C 109.5 . . ? 
H14A C14 H14C 109.5 . . ? 
H14B C14 H14C 109.5 . . ? 
C11 C15 H15A 109.5 . . ? 
C11 C15 H15B 109.5 . . ? 
H15A C15 H15B 109.5 . . ? 
C11 C15 H15C 109.5 . . ? 
H15A C15 H15C 109.5 . . ? 
H15B C15 H15C 109.5 . . ? 
C13 C16 H16A 109.5 . . ? 
C13 C16 H16B 109.5 . . ? 
H16A C16 H16B 109.5 . . ? 
C13 C16 H16C 109.5 . . ? 
H16A C16 H16C 109.5 . . ? 
H16B C16 H16C 109.5 . . ? 
C18 C17 C22 119.8(3) . . ? 
C18 C17 C7 119.5(3) . . ? 
C22 C17 C7 120.7(3) . . ? 
C19 C18 C17 119.3(3) . . ? 
C19 C18 C23 119.8(4) . . ? 
C17 C18 C23 120.9(3) . . ? 
C20 C19 C18 121.9(4) . . ? 
C20 C19 H19A 119.0 . . ? 
C18 C19 H19A 119.0 . . ? 
C21 C20 C19 117.9(3) . . ? 
C21 C20 C24 122.1(4) . . ? 
C19 C20 C24 120.0(4) . . ? 
C20 C21 C22 122.7(3) . . ? 
C20 C21 H21A 118.6 . . ? 
C22 C21 H21A 118.6 . . ? 
C21 C22 C17 118.3(3) . . ? 
C21 C22 C25 120.2(3) . . ? 
C17 C22 C25 121.6(3) . . ? 
C18 C23 H23A 109.5 . . ? 
C18 C23 H23B 109.5 . . ? 
H23A C23 H23B 109.5 . . ? 
C18 C23 H23C 109.5 . . ? 
H23A C23 H23C 109.5 . . ? 
H23B C23 H23C 109.5 . . ? 
C20 C24 H24A 109.5 . . ? 
C20 C24 H24B 109.5 . . ? 
H24A C24 H24B 109.5 . . ? 
C20 C24 H24C 109.5 . . ? 
H24A C24 H24C 109.5 . . ? 
H24B C24 H24C 109.5 . . ? 
C22 C25 H25A 109.5 . . ? 
C22 C25 H25B 109.5 . . ? 
H25A C25 H25B 109.5 . . ? 
C22 C25 H25C 109.5 . . ? 
H25A C25 H25C 109.5 . . ? 
H25B C25 H25C 109.5 . . ? 
C26 O4 Fe1 122.0(2) . . ? 
O5 C26 O4 125.2(3) . . ? 
O5 C26 C27 121.1(3) . . ? 
O4 C26 C27 113.7(3) . . ? 
C26 O5 Tl1 129.1(2) . . ? 
C32 C27 C28 121.0(3) . . ? 
C32 C27 C26 119.5(3) . . ? 
C28 C27 C26 119.6(3) . . ? 
C29 C28 C27 118.4(3) . . ? 
C29 C28 C33 119.9(3) . . ? 
C27 C28 C33 121.6(3) . . ? 
C30 C29 C28 120.9(4) . . ? 
C30 C29 H29A 119.6 . . ? 
C28 C29 H29A 119.6 . . ? 
C29 C30 C31 120.3(4) . . ? 
C29 C30 H30A 119.9 . . ? 
C31 C30 H30A 119.9 . . ? 
C30 C31 C32 121.1(4) . . ? 
C30 C31 H31A 119.5 . . ? 
C32 C31 H31A 119.5 . . ? 
C31 C32 C27 118.3(3) . . ? 
C31 C32 C42 118.4(3) . . ? 
C27 C32 C42 123.3(3) . . ? 
C34 C33 C38 119.8(3) . . ? 
C34 C33 C28 119.6(3) . . ? 
C38 C33 C28 120.6(3) . . ? 
C33 C34 C35 119.2(3) . . ? 
C33 C34 C39 121.4(3) . . ? 
C35 C34 C39 119.4(3) . . ? 
C36 C35 C34 121.7(3) . . ? 
C36 C35 H35A 119.1 . . ? 
C34 C35 H35A 119.1 . . ? 
C37 C36 C35 117.8(3) . . ? 
C37 C36 C40 121.7(4) . . ? 
C35 C36 C40 120.4(4) . . ? 
C36 C37 C38 122.4(4) . . ? 
C36 C37 H37A 118.8 . . ? 
C38 C37 H37A 118.8 . . ? 
C37 C38 C33 119.1(3) . . ? 
C37 C38 C41 120.0(3) . . ? 
C33 C38 C41 120.9(3) . . ? 
C34 C39 H39A 109.5 . . ? 
C34 C39 H39B 109.5 . . ? 
H39A C39 H39B 109.5 . . ? 
C34 C39 H39C 109.5 . . ? 
H39A C39 H39C 109.5 . . ? 
H39B C39 H39C 109.5 . . ? 
C36 C40 H40A 109.5 . . ? 
C36 C40 H40B 109.5 . . ? 
H40A C40 H40B 109.5 . . ? 
C36 C40 H40C 109.5 . . ? 
H40A C40 H40C 109.5 . . ? 
H40B C40 H40C 109.5 . . ? 
C38 C41 H41A 109.5 . . ? 
C38 C41 H41B 109.5 . . ? 
H41A C41 H41B 109.5 . . ? 
C38 C41 H41C 109.5 . . ? 
H41A C41 H41C 109.5 . . ? 
H41B C41 H41C 109.5 . . ? 
C43 C42 C47 119.2(3) . . ? 
C43 C42 C32 119.9(3) . . ? 
C47 C42 C32 120.9(3) . . ? 
C44 C43 C42 119.4(3) . . ? 
C44 C43 C48 120.2(3) . . ? 
C42 C43 C48 120.4(3) . . ? 
C43 C44 C45 122.5(4) . . ? 
C43 C44 H44A 118.8 . . ? 
C45 C44 H44A 118.8 . . ? 
C46 C45 C44 117.2(4) . . ? 
C46 C45 C49 121.7(4) . . ? 
C44 C45 C49 121.1(4) . . ? 
C45 C46 C47 122.5(4) . . ? 
C45 C46 H46A 118.8 . . ? 
C47 C46 H46A 118.8 . . ? 
C46 C47 C42 119.2(3) . . ? 
C46 C47 C50 120.3(4) . . ? 
C42 C47 C50 120.4(4) . . ? 
C43 C48 H48A 109.5 . . ? 
C43 C48 H48B 109.5 . . ? 
H48A C48 H48B 109.5 . . ? 
C43 C48 H48C 109.5 . . ? 
H48A C48 H48C 109.5 . . ? 
H48B C48 H48C 109.5 . . ? 
C45 C49 H49A 109.5 . . ? 
C45 C49 H49B 109.5 . . ? 
H49A C49 H49B 109.5 . . ? 
C45 C49 H49C 109.5 . . ? 
H49A C49 H49C 109.5 . . ? 
H49B C49 H49C 109.5 . . ? 
C47 C50 H50A 109.5 . . ? 
C47 C50 H50B 109.5 . . ? 
H50A C50 H50B 109.5 . . ? 
C47 C50 H50C 109.5 . . ? 
H50A C50 H50C 109.5 . . ? 
H50B C50 H50C 109.5 . . ? 
C51 O6 Fe1 123.5(2) . . ? 
O7 C51 O6 125.3(3) . . ? 
O7 C51 C52 120.5(3) . . ? 
O6 C51 C52 114.2(3) . . ? 
C51 O7 Tl1 128.4(2) . . ? 
C57 C52 C53 121.4(3) . . ? 
C57 C52 C51 119.9(3) . . ? 
C53 C52 C51 118.7(3) . . ? 
C54 C53 C52 118.2(3) . . ? 
C54 C53 C58 120.3(3) . . ? 
C52 C53 C58 121.4(3) . . ? 
C55 C54 C53 121.3(3) . . ? 
C55 C54 H54A 119.4 . . ? 
C53 C54 H54A 119.4 . . ? 
C54 C55 C56 119.8(3) . . ? 
C54 C55 H55A 120.1 . . ? 
C56 C55 H55A 120.1 . . ? 
C55 C56 C57 120.7(3) . . ? 
C55 C56 H56A 119.7 . . ? 
C57 C56 H56A 119.7 . . ? 
C56 C57 C52 118.6(3) . . ? 
C56 C57 C67 118.7(3) . . ? 
C52 C57 C67 122.7(3) . . ? 
C63 C58 C59 120.2(3) . . ? 
C63 C58 C53 120.8(3) . . ? 
C59 C58 C53 119.0(3) . . ? 
C60 C59 C58 118.8(3) . . ? 
C60 C59 C64 120.3(4) . . ? 
C58 C59 C64 120.8(3) . . ? 
C61 C60 C59 122.1(4) . . ? 
C61 C60 H60A 118.9 . . ? 
C59 C60 H60A 118.9 . . ? 
C60 C61 C62 117.9(3) . . ? 
C60 C61 C65 121.4(4) . . ? 
C62 C61 C65 120.6(4) . . ? 
C63 C62 C61 122.2(4) . . ? 
C63 C62 H62A 118.9 . . ? 
C61 C62 H62A 118.9 . . ? 
C62 C63 C58 118.6(3) . . ? 
C62 C63 C66 119.9(4) . . ? 
C58 C63 C66 121.3(3) . . ? 
C59 C64 H64A 109.5 . . ? 
C59 C64 H64B 109.5 . . ? 
H64A C64 H64B 109.5 . . ? 
C59 C64 H64C 109.5 . . ? 
H64A C64 H64C 109.5 . . ? 
H64B C64 H64C 109.5 . . ? 
C61 C65 H65A 109.5 . . ? 
C61 C65 H65B 109.5 . . ? 
H65A C65 H65B 109.5 . . ? 
C61 C65 H65C 109.5 . . ? 
H65A C65 H65C 109.5 . . ? 
H65B C65 H65C 109.5 . . ? 
C63 C66 H66A 109.5 . . ? 
C63 C66 H66B 109.5 . . ? 
H66A C66 H66B 109.5 . . ? 
C63 C66 H66C 109.5 . . ? 
H66A C66 H66C 109.5 . . ? 
H66B C66 H66C 109.5 . . ? 
C68 C67 C72 119.7(3) . . ? 
C68 C67 C57 119.0(3) . . ? 
C72 C67 C57 121.3(3) . . ? 
C69 C68 C67 119.5(3) . . ? 
C69 C68 C73 119.8(3) . . ? 
C67 C68 C73 120.7(3) . . ? 
C70 C69 C68 121.4(3) . . ? 
C70 C69 H69A 119.3 . . ? 
C68 C69 H69A 119.3 . . ? 
C71 C70 C69 118.5(3) . . ? 
C71 C70 C74 121.0(3) . . ? 
C69 C70 C74 120.5(4) . . ? 
C70 C71 C72 121.7(3) . . ? 
C70 C71 H71A 119.1 . . ? 
C72 C71 H71A 119.1 . . ? 
C71 C72 C67 119.2(3) . . ? 
C71 C72 C75 119.7(3) . . ? 
C67 C72 C75 121.1(3) . . ? 
C68 C73 H73A 109.5 . . ? 
C68 C73 H73B 109.5 . . ? 
H73A C73 H73B 109.5 . . ? 
C68 C73 H73C 109.5 . . ? 
H73A C73 H73C 109.5 . . ? 
H73B C73 H73C 109.5 . . ? 
C70 C74 H74A 109.5 . . ? 
C70 C74 H74B 109.5 . . ? 
H74A C74 H74B 109.5 . . ? 
C70 C74 H74C 109.5 . . ? 
H74A C74 H74C 109.5 . . ? 
H74B C74 H74C 109.5 . . ? 
C72 C75 H75A 109.5 . . ? 
C72 C75 H75B 109.5 . . ? 
H75A C75 H75B 109.5 . . ? 
C72 C75 H75C 109.5 . . ? 
H75A C75 H75C 109.5 . . ? 
H75B C75 H75C 109.5 . . ? 
C77 C76 C80 102.2(5) . . ? 
C77 C76 C81 116.5(6) . . ? 
C80 C76 C81 115.5(5) . . ? 
C77 C76 H76A 107.3 . . ? 
C80 C76 H76A 107.3 . . ? 
C81 C76 H76A 107.3 . . ? 
C76 C77 C78 106.9(4) . . ? 
C76 C77 H77A 110.3 . . ? 
C78 C77 H77A 110.3 . . ? 
C76 C77 H77B 110.3 . . ? 
C78 C77 H77B 110.3 . . ? 
H77A C77 H77B 108.6 . . ? 
C79 C78 C77 105.4(4) . . ? 
C79 C78 H78A 110.7 . . ? 
C77 C78 H78A 110.7 . . ? 
C79 C78 H78B 110.7 . . ? 
C77 C78 H78B 110.7 . . ? 
H78A C78 H78B 108.8 . . ? 
C78 C79 C80 105.6(4) . . ? 
C78 C79 H79A 110.6 . . ? 
C80 C79 H79A 110.6 . . ? 
C78 C79 H79B 110.6 . . ? 
C80 C79 H79B 110.6 . . ? 
H79A C79 H79B 108.8 . . ? 
C76 C80 C79 104.5(4) . . ? 
C76 C80 H80A 110.9 . . ? 
C79 C80 H80A 110.9 . . ? 
C76 C80 H80B 110.9 . . ? 
C79 C80 H80B 110.9 . . ? 
H80A C80 H80B 108.9 . . ? 
C76 C81 H81A 109.5 . . ? 
C76 C81 H81B 109.5 . . ? 
H81A C81 H81B 109.5 . . ? 
C76 C81 H81C 109.5 . . ? 
H81A C81 H81C 109.5 . . ? 
H81B C81 H81C 109.5 . . ? 
 
loop_ 
 _geom_torsion_atom_site_label_1 
 _geom_torsion_atom_site_label_2 
 _geom_torsion_atom_site_label_3 
 _geom_torsion_atom_site_label_4 
 _geom_torsion 
 _geom_torsion_site_symmetry_1 
 _geom_torsion_site_symmetry_2 
 _geom_torsion_site_symmetry_3 
 _geom_torsion_site_symmetry_4 
 _geom_torsion_publ_flag 
O2 Fe1 N1 O1 89(8) . . . . ? 
O4 Fe1 N1 O1 -30(8) . . . . ? 
O6 Fe1 N1 O1 -150(8) . . . . ? 
N1 Fe1 O2 C1 -144.6(2) . . . . ? 
O4 Fe1 O2 C1 -33.4(3) . . . . ? 
O6 Fe1 O2 C1 102.2(2) . . . . ? 
Fe1 O2 C1 O3 -12.1(4) . . . . ? 
Fe1 O2 C1 C2 166.3(2) . . . . ? 
O2 C1 O3 Tl1 -61.8(5) . . . . ? 
C2 C1 O3 Tl1 119.9(3) . . . . ? 
O7 Tl1 O3 C1 16.3(3) . . . . ? 
O5 Tl1 O3 C1 100.7(3) . . . . ? 
O3 C1 C2 C3 127.3(4) . . . . ? 
O2 C1 C2 C3 -51.1(4) . . . . ? 
O3 C1 C2 C7 -51.2(4) . . . . ? 
O2 C1 C2 C7 130.4(3) . . . . ? 
C7 C2 C3 C4 0.3(5) . . . . ? 
C1 C2 C3 C4 -178.2(3) . . . . ? 
C7 C2 C3 C8 177.8(3) . . . . ? 
C1 C2 C3 C8 -0.6(5) . . . . ? 
C2 C3 C4 C5 -1.5(5) . . . . ? 
C8 C3 C4 C5 -179.1(3) . . . . ? 
C3 C4 C5 C6 1.0(5) . . . . ? 
C4 C5 C6 C7 0.7(5) . . . . ? 
C5 C6 C7 C2 -1.8(5) . . . . ? 
C5 C6 C7 C17 178.8(3) . . . . ? 
C3 C2 C7 C6 1.4(5) . . . . ? 
C1 C2 C7 C6 179.8(3) . . . . ? 
C3 C2 C7 C17 -179.3(3) . . . . ? 
C1 C2 C7 C17 -0.9(5) . . . . ? 
C4 C3 C8 C9 99.4(4) . . . . ? 
C2 C3 C8 C9 -78.2(4) . . . . ? 
C4 C3 C8 C13 -79.3(4) . . . . ? 
C2 C3 C8 C13 103.1(4) . . . . ? 
C13 C8 C9 C10 -0.4(5) . . . . ? 
C3 C8 C9 C10 -179.1(3) . . . . ? 
C13 C8 C9 C14 -178.9(3) . . . . ? 
C3 C8 C9 C14 2.4(5) . . . . ? 
C8 C9 C10 C11 0.3(5) . . . . ? 
C14 C9 C10 C11 178.8(3) . . . . ? 
C9 C10 C11 C12 -0.2(6) . . . . ? 
C9 C10 C11 C15 -178.8(4) . . . . ? 
C10 C11 C12 C13 0.1(6) . . . . ? 
C15 C11 C12 C13 178.8(4) . . . . ? 
C11 C12 C13 C8 -0.1(5) . . . . ? 
C11 C12 C13 C16 -177.0(4) . . . . ? 
C9 C8 C13 C12 0.3(5) . . . . ? 
C3 C8 C13 C12 179.0(3) . . . . ? 
C9 C8 C13 C16 177.1(3) . . . . ? 
C3 C8 C13 C16 -4.2(5) . . . . ? 
C6 C7 C17 C18 -73.4(4) . . . . ? 
C2 C7 C17 C18 107.3(4) . . . . ? 
C6 C7 C17 C22 106.3(4) . . . . ? 
C2 C7 C17 C22 -73.1(5) . . . . ? 
C22 C17 C18 C19 0.1(6) . . . . ? 
C7 C17 C18 C19 179.7(3) . . . . ? 
C22 C17 C18 C23 179.0(4) . . . . ? 
C7 C17 C18 C23 -1.4(6) . . . . ? 
C17 C18 C19 C20 0.5(6) . . . . ? 
C23 C18 C19 C20 -178.4(4) . . . . ? 
C18 C19 C20 C21 -0.6(6) . . . . ? 
C18 C19 C20 C24 178.4(4) . . . . ? 
C19 C20 C21 C22 0.2(6) . . . . ? 
C24 C20 C21 C22 -178.9(4) . . . . ? 
C20 C21 C22 C17 0.4(5) . . . . ? 
C20 C21 C22 C25 -179.5(3) . . . . ? 
C18 C17 C22 C21 -0.5(5) . . . . ? 
C7 C17 C22 C21 179.8(3) . . . . ? 
C18 C17 C22 C25 179.4(3) . . . . ? 
C7 C17 C22 C25 -0.3(5) . . . . ? 
N1 Fe1 O4 C26 -143.8(2) . . . . ? 
O2 Fe1 O4 C26 104.5(2) . . . . ? 
O6 Fe1 O4 C26 -30.7(3) . . . . ? 
Fe1 O4 C26 O5 -9.2(5) . . . . ? 
Fe1 O4 C26 C27 170.7(2) . . . . ? 
O4 C26 O5 Tl1 -64.2(4) . . . . ? 
C27 C26 O5 Tl1 115.9(3) . . . . ? 
O7 Tl1 O5 C26 100.3(3) . . . . ? 
O3 Tl1 O5 C26 17.7(3) . . . . ? 
O5 C26 C27 C32 -50.3(5) . . . . ? 
O4 C26 C27 C32 129.8(3) . . . . ? 
O5 C26 C27 C28 129.3(3) . . . . ? 
O4 C26 C27 C28 -50.6(4) . . . . ? 
C32 C27 C28 C29 -1.7(5) . . . . ? 
C26 C27 C28 C29 178.7(3) . . . . ? 
C32 C27 C28 C33 175.4(3) . . . . ? 
C26 C27 C28 C33 -4.2(5) . . . . ? 
C27 C28 C29 C30 -1.1(6) . . . . ? 
C33 C28 C29 C30 -178.3(4) . . . . ? 
C28 C29 C30 C31 2.7(6) . . . . ? 
C29 C30 C31 C32 -1.4(7) . . . . ? 
C30 C31 C32 C27 -1.4(6) . . . . ? 
C30 C31 C32 C42 179.0(4) . . . . ? 
C28 C27 C32 C31 3.0(5) . . . . ? 
C26 C27 C32 C31 -177.4(3) . . . . ? 
C28 C27 C32 C42 -177.4(3) . . . . ? 
C26 C27 C32 C42 2.2(5) . . . . ? 
C29 C28 C33 C34 100.6(4) . . . . ? 
C27 C28 C33 C34 -76.5(4) . . . . ? 
C29 C28 C33 C38 -79.3(4) . . . . ? 
C27 C28 C33 C38 103.6(4) . . . . ? 
C38 C33 C34 C35 -0.7(5) . . . . ? 
C28 C33 C34 C35 179.4(3) . . . . ? 
C38 C33 C34 C39 179.6(3) . . . . ? 
C28 C33 C34 C39 -0.3(5) . . . . ? 
C33 C34 C35 C36 -0.5(5) . . . . ? 
C39 C34 C35 C36 179.2(3) . . . . ? 
C34 C35 C36 C37 1.0(5) . . . . ? 
C34 C35 C36 C40 -178.6(4) . . . . ? 
C35 C36 C37 C38 -0.3(6) . . . . ? 
C40 C36 C37 C38 179.4(4) . . . . ? 
C36 C37 C38 C33 -0.9(5) . . . . ? 
C36 C37 C38 C41 -177.8(4) . . . . ? 
C34 C33 C38 C37 1.4(5) . . . . ? 
C28 C33 C38 C37 -178.7(3) . . . . ? 
C34 C33 C38 C41 178.2(3) . . . . ? 
C28 C33 C38 C41 -1.8(5) . . . . ? 
C31 C32 C42 C43 -83.1(4) . . . . ? 
C27 C32 C42 C43 97.2(4) . . . . ? 
C31 C32 C42 C47 95.0(4) . . . . ? 
C27 C32 C42 C47 -84.6(4) . . . . ? 
C47 C42 C43 C44 -2.4(5) . . . . ? 
C32 C42 C43 C44 175.8(3) . . . . ? 
C47 C42 C43 C48 178.5(3) . . . . ? 
C32 C42 C43 C48 -3.3(5) . . . . ? 
C42 C43 C44 C45 2.3(5) . . . . ? 
C48 C43 C44 C45 -178.6(3) . . . . ? 
C43 C44 C45 C46 -0.8(6) . . . . ? 
C43 C44 C45 C49 179.5(4) . . . . ? 
C44 C45 C46 C47 -0.4(6) . . . . ? 
C49 C45 C46 C47 179.2(4) . . . . ? 
C45 C46 C47 C42 0.2(6) . . . . ? 
C45 C46 C47 C50 -177.5(4) . . . . ? 
C43 C42 C47 C46 1.2(5) . . . . ? 
C32 C42 C47 C46 -177.0(3) . . . . ? 
C43 C42 C47 C50 178.9(3) . . . . ? 
C32 C42 C47 C50 0.7(5) . . . . ? 
N1 Fe1 O6 C51 -143.8(2) . . . . ? 
O2 Fe1 O6 C51 -31.1(3) . . . . ? 
O4 Fe1 O6 C51 103.9(2) . . . . ? 
Fe1 O6 C51 O7 -11.6(5) . . . . ? 
Fe1 O6 C51 C52 168.1(2) . . . . ? 
O6 C51 O7 Tl1 -62.1(4) . . . . ? 
C52 C51 O7 Tl1 118.2(3) . . . . ? 
O3 Tl1 O7 C51 99.7(3) . . . . ? 
O5 Tl1 O7 C51 17.4(3) . . . . ? 
O7 C51 C52 C57 -54.0(5) . . . . ? 
O6 C51 C52 C57 126.3(4) . . . . ? 
O7 C51 C52 C53 125.6(4) . . . . ? 
O6 C51 C52 C53 -54.1(4) . . . . ? 
C57 C52 C53 C54 -1.3(6) . . . . ? 
C51 C52 C53 C54 179.2(4) . . . . ? 
C57 C52 C53 C58 174.8(3) . . . . ? 
C51 C52 C53 C58 -4.8(5) . . . . ? 
C52 C53 C54 C55 -0.9(7) . . . . ? 
C58 C53 C54 C55 -176.9(4) . . . . ? 
C53 C54 C55 C56 1.3(8) . . . . ? 
C54 C55 C56 C57 0.3(8) . . . . ? 
C55 C56 C57 C52 -2.4(7) . . . . ? 
C55 C56 C57 C67 176.5(4) . . . . ? 
C53 C52 C57 C56 2.9(6) . . . . ? 
C51 C52 C57 C56 -177.6(4) . . . . ? 
C53 C52 C57 C67 -176.0(4) . . . . ? 
C51 C52 C57 C67 3.5(6) . . . . ? 
C54 C53 C58 C63 -85.4(5) . . . . ? 
C52 C53 C58 C63 98.6(4) . . . . ? 
C54 C53 C58 C59 95.8(4) . . . . ? 
C52 C53 C58 C59 -80.1(4) . . . . ? 
C63 C58 C59 C60 0.3(5) . . . . ? 
C53 C58 C59 C60 179.0(3) . . . . ? 
C63 C58 C59 C64 180.0(3) . . . . ? 
C53 C58 C59 C64 -1.3(5) . . . . ? 
C58 C59 C60 C61 -0.2(5) . . . . ? 
C64 C59 C60 C61 -179.9(3) . . . . ? 
C59 C60 C61 C62 -0.1(6) . . . . ? 
C59 C60 C61 C65 -178.8(4) . . . . ? 
C60 C61 C62 C63 0.4(5) . . . . ? 
C65 C61 C62 C63 179.1(4) . . . . ? 
C61 C62 C63 C58 -0.4(5) . . . . ? 
C61 C62 C63 C66 -177.4(3) . . . . ? 
C59 C58 C63 C62 0.0(5) . . . . ? 
C53 C58 C63 C62 -178.7(3) . . . . ? 
C59 C58 C63 C66 176.9(3) . . . . ? 
C53 C58 C63 C66 -1.8(5) . . . . ? 
C56 C57 C67 C68 -81.8(5) . . . . ? 
C52 C57 C67 C68 97.0(4) . . . . ? 
C56 C57 C67 C72 96.2(5) . . . . ? 
C52 C57 C67 C72 -85.0(5) . . . . ? 
C72 C67 C68 C69 -3.3(5) . . . . ? 
C57 C67 C68 C69 174.7(3) . . . . ? 
C72 C67 C68 C73 174.9(3) . . . . ? 
C57 C67 C68 C73 -7.1(5) . . . . ? 
C67 C68 C69 C70 2.4(5) . . . . ? 
C73 C68 C69 C70 -175.8(3) . . . . ? 
C68 C69 C70 C71 -0.2(5) . . . . ? 
C68 C69 C70 C74 180.0(3) . . . . ? 
C69 C70 C71 C72 -1.2(5) . . . . ? 
C74 C70 C71 C72 178.7(3) . . . . ? 
C70 C71 C72 C67 0.2(5) . . . . ? 
C70 C71 C72 C75 -179.7(4) . . . . ? 
C68 C67 C72 C71 2.0(5) . . . . ? 
C57 C67 C72 C71 -176.0(3) . . . . ? 
C68 C67 C72 C75 -178.1(3) . . . . ? 
C57 C67 C72 C75 3.9(5) . . . . ? 
C80 C76 C77 C78 34.5(6) . . . . ? 
C81 C76 C77 C78 161.4(5) . . . . ? 
C76 C77 C78 C79 -16.3(6) . . . . ? 
C77 C78 C79 C80 -8.2(6) . . . . ? 
C77 C76 C80 C79 -39.2(5) . . . . ? 
C81 C76 C80 C79 -166.8(6) . . . . ? 
C78 C79 C80 C76 29.7(6) . . . . ? 
 
_diffrn_measured_fraction_theta_max    0.998 
_diffrn_reflns_theta_full              26.38 
_diffrn_measured_fraction_theta_full   0.998 
_refine_diff_density_max    0.583 
_refine_diff_density_min   -0.460 
_refine_diff_density_rms    0.080 

 
data_Complex4 
 
_audit_creation_method            SHELXL-97 
_chemical_name_systematic 
; 
 ? 
; 
_chemical_name_common             05279yyy 
_chemical_melting_point           ? 
_chemical_formula_moiety          'C100 H104 Fe4 N4 O16, 4(C4 H8 Cl8)'  
_chemical_formula_sum             'C104 H112 Cl8 Fe4 N4 O16' 
_chemical_formula_weight          2180.98 
 
loop_ 
 _atom_type_symbol 
 _atom_type_description 
 _atom_type_scat_dispersion_real 
 _atom_type_scat_dispersion_imag 
 _atom_type_scat_source 
 'C'  'C'   0.0033   0.0016 
 'International Tables Vol C Tables 4.2.6.8 and 6.1.1.4' 
 'H'  'H'   0.0000   0.0000 
 'International Tables Vol C Tables 4.2.6.8 and 6.1.1.4' 
 'N'  'N'   0.0061   0.0033 
 'International Tables Vol C Tables 4.2.6.8 and 6.1.1.4' 
 'O'  'O'   0.0106   0.0060 
 'International Tables Vol C Tables 4.2.6.8 and 6.1.1.4' 
 'Cl'  'Cl'   0.1484   0.1585 
 'International Tables Vol C Tables 4.2.6.8 and 6.1.1.4' 
 'Fe'  'Fe'   0.3463   0.8444 
 'International Tables Vol C Tables 4.2.6.8 and 6.1.1.4' 
 
_symmetry_cell_setting            Monoclinic 
_symmetry_space_group_name_H-M    'C 2/c' 
 
loop_ 
 _symmetry_equiv_pos_as_xyz 
 'x, y, z' 
 '-x, y, -z+1/2' 
 'x+1/2, y+1/2, z' 
 '-x+1/2, y+1/2, -z+1/2' 
 '-x, -y, -z' 
 'x, -y, z-1/2' 
 '-x+1/2, -y+1/2, -z' 
 'x+1/2, -y+1/2, z-1/2' 
 
_cell_length_a                    28.627(6) 
_cell_length_b                    13.815(3) 
_cell_length_c                    28.691(6) 
_cell_angle_alpha                 90.00 
_cell_angle_beta                  113.068(3) 
_cell_angle_gamma                 90.00 
_cell_volume                      10439(4) 
_cell_formula_units_Z             4 
_cell_measurement_temperature     173(2) 
_cell_measurement_reflns_used     2507 
_cell_measurement_theta_min       2.508 
_cell_measurement_theta_max       24.97
 
_exptl_crystal_description        Block 
_exptl_crystal_colour             Red 
_exptl_crystal_size_max           0.25 
_exptl_crystal_size_mid           0.10 
_exptl_crystal_size_min           0.05 
_exptl_crystal_density_meas       ? 
_exptl_crystal_density_diffrn     1.388 
_exptl_crystal_density_method     'not measured' 
_exptl_crystal_F_000              4528 
_exptl_absorpt_coefficient_mu     0.814 
_exptl_absorpt_correction_type    Multi-scan 
_exptl_absorpt_correction_T_min   0.907 
_exptl_absorpt_correction_T_max   0.960 
_exptl_absorpt_process_details    'SADABS (Sheldrick, 2003)' 
 
_exptl_special_details            'Dr. D. Klein / Prof. L. Que' 
 
_diffrn_ambient_temperature       173(2) 
_diffrn_radiation_wavelength      0.71073 
_diffrn_radiation_type            MoK\a 
_diffrn_radiation_source         'sealed tube'
_diffrn_radiation_monochromator  'graphite'
_diffrn_measurement_device_type  'CCD area detector'
_diffrn_measurement_method       'phi and omega scans'
_diffrn_detector_area_resol_mean  ? 
_diffrn_standards_number          ? 
_diffrn_standards_interval_count  ? 
_diffrn_standards_interval_time   ? 
_diffrn_standards_decay_%         ? 
_diffrn_reflns_number             56589 
_diffrn_reflns_av_R_equivalents   0.1000 
_diffrn_reflns_av_sigmaI/netI     0.1606 
_diffrn_reflns_limit_h_min        -34 
_diffrn_reflns_limit_h_max        31 
_diffrn_reflns_limit_k_min        0 
_diffrn_reflns_limit_k_max        16 
_diffrn_reflns_limit_l_min        0 
_diffrn_reflns_limit_l_max        34 
_diffrn_reflns_theta_min          1.54 
_diffrn_reflns_theta_max          25.11 
_reflns_number_total              9387 
_reflns_number_gt                 4556 
_reflns_threshold_expression      >2sigma(I) 
 
_computing_data_collection      'Bruker SMART'
_computing_cell_refinement      'Bruker SMART'
_computing_data_reduction       'Bruker SAINT'
_computing_structure_solution   'Bruker SHELXTL'
_computing_structure_refinement 'Bruker SHELXTL'
_computing_molecular_graphics   'Bruker SHELXTL'
_computing_publication_material 'Bruker SHELXTL'
 
_refine_special_details 
; 
 Refinement of F^2^ against ALL reflections.  The weighted R-factor wR and 
 goodness of fit S are based on F^2^, conventional R-factors R are based 
 on F, with F set to zero for negative F^2^. The threshold expression of 
 F^2^ > 2sigma(F^2^) is used only for calculating R-factors(gt) etc. and is 
 not relevant to the choice of reflections for refinement.  R-factors based 
 on F^2^ are statistically about twice as large as those based on F, and R- 
 factors based on ALL data will be even larger. 
; 
 
_refine_ls_structure_factor_coef  Fsqd  
_refine_ls_matrix_type            full 
_refine_ls_weighting_scheme       calc  
_refine_ls_weighting_details 
 'calc w=1/[\s^2^(Fo^2^)+(0.0640P)^2^+0.0000P] where P=(Fo^2^+2Fc^2^)/3' 
_atom_sites_solution_primary      direct 
_atom_sites_solution_secondary    difmap 
_atom_sites_solution_hydrogens    geom 
_refine_ls_hydrogen_treatment     riding 
_refine_ls_extinction_method      none 
_refine_ls_extinction_coef        ? 
_refine_ls_number_reflns          9387 
_refine_ls_number_parameters      614 
_refine_ls_number_restraints      13 
_refine_ls_R_factor_all           0.1509 
_refine_ls_R_factor_gt            0.0710 
_refine_ls_wR_factor_ref          0.1640 
_refine_ls_wR_factor_gt           0.1440 
_refine_ls_goodness_of_fit_ref    0.981 
_refine_ls_restrained_S_all       0.982 
_refine_ls_shift/su_max           0.001 
_refine_ls_shift/su_mean          0.000 
 
loop_ 
 _atom_site_label 
 _atom_site_type_symbol 
 _atom_site_fract_x 
 _atom_site_fract_y 
 _atom_site_fract_z 
 _atom_site_U_iso_or_equiv 
 _atom_site_adp_type 
 _atom_site_occupancy 
 _atom_site_symmetry_multiplicity 
 _atom_site_calc_flag 
 _atom_site_refinement_flags 
 _atom_site_disorder_assembly 
 _atom_site_disorder_group 
Fe1 Fe 0.93918(3) 0.58042(6) 0.24246(3) 0.0225(2) Uani 1 1 d . . . 
Fe2 Fe 0.98213(3) 0.42410(6) 0.18735(3) 0.0214(2) Uani 1 1 d . . . 
O1 O 0.95409(14) 0.4286(3) 0.24455(13) 0.0219(10) Uani 1 1 d . . . 
H1A H 0.9254 0.3839 0.2411 0.026 Uiso 1 1 calc R . . 
O2 O 0.98611(14) 0.5755(3) 0.20239(13) 0.0210(10) Uani 1 1 d . . . 
H2A H 0.9776 0.6201 0.1727 0.025 Uiso 1 1 calc R . . 
N1 N 0.9263(2) 0.7053(4) 0.24472(19) 0.0317(14) Uani 1 1 d . . . 
O3 O 0.9170(3) 0.7730(5) 0.2616(2) 0.103(3) Uani 1 1 d . . . 
N2 N 0.9735(2) 0.2989(4) 0.1723(2) 0.0293(14) Uani 1 1 d . . . 
O4 O 0.9518(2) 0.2316(5) 0.1542(3) 0.105(3) Uani 1 1 d . . . 
O5 O 0.91224(15) 0.5499(3) 0.29643(15) 0.0253(10) Uani 1 1 d . . . 
O6 O 0.97198(16) 0.4539(3) 0.35199(15) 0.0243(10) Uani 1 1 d . . . 
C1 C 0.9285(3) 0.4946(4) 0.3343(2) 0.0236(15) Uani 1 1 d . . . 
C2 C 0.8931(2) 0.4720(4) 0.3602(2) 0.0244(15) Uani 1 1 d . . . 
C3 C 0.8740(2) 0.3769(5) 0.3552(2) 0.0279(16) Uani 1 1 d . . . 
C4 C 0.8410(3) 0.3528(5) 0.3778(3) 0.043(2) Uani 1 1 d . . . 
H4A H 0.8283 0.2886 0.3745 0.051 Uiso 1 1 calc R . . 
C5 C 0.8260(3) 0.4195(6) 0.4050(3) 0.046(2) Uani 1 1 d . . . 
H5A H 0.8035 0.4016 0.4207 0.056 Uiso 1 1 calc R . . 
C6 C 0.8444(3) 0.5130(5) 0.4089(3) 0.041(2) Uani 1 1 d . . . 
H6A H 0.8344 0.5590 0.4278 0.049 Uiso 1 1 calc R . . 
C7 C 0.8770(2) 0.5422(5) 0.3862(2) 0.0300(16) Uani 1 1 d . . . 
C8 C 0.8874(2) 0.3025(5) 0.3237(2) 0.0295(16) Uani 1 1 d . . . 
C9 C 0.8618(2) 0.3042(5) 0.2710(3) 0.0328(17) Uani 1 1 d . . . 
C10 C 0.8746(3) 0.2342(5) 0.2419(3) 0.0352(18) Uani 1 1 d . . . 
H10A H 0.8587 0.2358 0.2060 0.042 Uiso 1 1 calc R . . 
C11 C 0.9106(3) 0.1630(5) 0.2658(3) 0.0354(18) Uani 1 1 d . . . 
C12 C 0.9344(3) 0.1640(5) 0.3177(3) 0.0336(17) Uani 1 1 d . . . 
H12A H 0.9592 0.1156 0.3336 0.040 Uiso 1 1 calc R . . 
C13 C 0.9244(3) 0.2316(5) 0.3480(3) 0.0324(17) Uani 1 1 d . . . 
C14 C 0.8198(3) 0.3767(5) 0.2442(2) 0.043(2) Uani 1 1 d . . . 
H14A H 0.8276 0.4381 0.2628 0.065 Uiso 1 1 d R . . 
H14B H 0.7875 0.3515 0.2433 0.065 Uiso 1 1 d R . . 
H14C H 0.8173 0.3875 0.2095 0.065 Uiso 1 1 d R . . 
C15 C 0.9226(3) 0.0873(5) 0.2340(3) 0.064(3) Uani 1 1 d . . . 
H15A H 0.9595 0.0792 0.2464 0.097 Uiso 1 1 d R . . 
H15B H 0.9094 0.1075 0.1984 0.097 Uiso 1 1 d R . . 
H15C H 0.9069 0.0258 0.2369 0.097 Uiso 1 1 d R . . 
C16 C 0.9541(3) 0.2317(5) 0.4036(3) 0.047(2) Uani 1 1 d . . . 
H16A H 0.9706 0.1687 0.4145 0.070 Uiso 1 1 d R . . 
H16B H 0.9310 0.2443 0.4206 0.070 Uiso 1 1 d R . . 
H16C H 0.9800 0.2826 0.4125 0.070 Uiso 1 1 d R . . 
C17 C 0.8955(3) 0.6463(5) 0.3937(2) 0.0293(17) Uani 1 1 d . . . 
C18 C 0.8708(3) 0.7144(5) 0.3555(3) 0.0375(18) Uani 1 1 d . . . 
C19 C 0.8874(3) 0.8113(5) 0.3648(3) 0.043(2) Uani 1 1 d . . . 
H19A H 0.8714 0.8591 0.3397 0.051 Uiso 1 1 calc R . . 
C20 C 0.9265(3) 0.8386(5) 0.4099(3) 0.044(2) Uani 1 1 d . . . 
C21 C 0.9486(3) 0.7692(5) 0.4464(3) 0.0420(19) Uani 1 1 d . . . 
H21A H 0.9743 0.7879 0.4779 0.050 Uiso 1 1 calc R . . 
C22 C 0.9341(3) 0.6732(5) 0.4385(3) 0.0324(17) Uani 1 1 d . . . 
C23 C 0.8272(3) 0.6897(6) 0.3073(2) 0.048(2) Uani 1 1 d . . . 
H23A H 0.8372 0.6376 0.2899 0.072 Uiso 1 1 d R . . 
H23B H 0.8174 0.7470 0.2855 0.072 Uiso 1 1 d R . . 
H23C H 0.7983 0.6684 0.3150 0.072 Uiso 1 1 d R . . 
C24 C 0.9432(4) 0.9441(5) 0.4191(3) 0.072(3) Uani 1 1 d . . . 
H24A H 0.9803 0.9469 0.4333 0.108 Uiso 1 1 d R . . 
H24B H 0.9305 0.9730 0.4431 0.108 Uiso 1 1 d R . . 
H24C H 0.9296 0.9799 0.3871 0.108 Uiso 1 1 d R . . 
C25 C 0.9591(3) 0.6008(5) 0.4801(3) 0.046(2) Uani 1 1 d . . . 
H25A H 0.9679 0.5429 0.4656 0.068 Uiso 1 1 d R . . 
H25B H 0.9361 0.5830 0.4966 0.068 Uiso 1 1 d R . . 
H25C H 0.9900 0.6295 0.5052 0.068 Uiso 1 1 d R . . 
O7 O 0.87701(15) 0.5501(3) 0.17574(15) 0.0236(10) Uani 1 1 d . . . 
O8 O 0.91233(16) 0.4546(3) 0.13450(15) 0.0273(11) Uani 1 1 d . . . 
C26 C 0.8771(2) 0.5090(4) 0.1361(2) 0.0234(15) Uani 1 1 d . . . 
C27 C 0.8338(2) 0.5301(5) 0.0862(2) 0.0259(16) Uani 1 1 d . . . 
C28 C 0.8316(2) 0.6239(5) 0.0662(2) 0.0246(15) Uani 1 1 d . . . 
C29 C 0.7932(2) 0.6459(5) 0.0205(2) 0.0301(17) Uani 1 1 d . . . 
H29A H 0.7916 0.7091 0.0069 0.036 Uiso 1 1 calc R . . 
C30 C 0.7574(3) 0.5794(5) -0.0060(2) 0.0358(17) Uani 1 1 d . . . 
H30A H 0.7308 0.5969 -0.0370 0.043 Uiso 1 1 calc R . . 
C31 C 0.7603(3) 0.4863(5) 0.0127(2) 0.0342(18) Uani 1 1 d . . . 
H31A H 0.7355 0.4399 -0.0060 0.041 Uiso 1 1 calc R . . 
C32 C 0.7989(2) 0.4592(5) 0.0585(2) 0.0247(15) Uani 1 1 d . . . 
C33 C 0.8714(2) 0.6977(4) 0.0937(2) 0.0249(16) Uani 1 1 d . . . 
C34 C 0.8609(3) 0.7699(5) 0.1233(2) 0.0294(16) Uani 1 1 d . . . 
C35 C 0.8981(3) 0.8394(5) 0.1473(3) 0.0364(18) Uani 1 1 d . . . 
H35A H 0.8911 0.8891 0.1665 0.044 Uiso 1 1 calc R . . 
C36 C 0.9455(3) 0.8373(5) 0.1436(2) 0.0361(18) Uani 1 1 d . . . 
C37 C 0.9546(3) 0.7652(5) 0.1146(2) 0.0362(18) Uani 1 1 d . . . 
H37A H 0.9867 0.7625 0.1123 0.043 Uiso 1 1 calc R . . 
C38 C 0.9180(2) 0.6965(5) 0.0889(2) 0.0299(17) Uani 1 1 d . . . 
C39 C 0.8127(3) 0.7683(5) 0.1323(3) 0.0396(19) Uani 1 1 d . . . 
H39A H 0.7835 0.7692 0.0997 0.059 Uiso 1 1 d R . . 
H39B H 0.8116 0.8252 0.1522 0.059 Uiso 1 1 d R . . 
H39C H 0.8117 0.7094 0.1509 0.059 Uiso 1 1 d R . . 
C40 C 0.9852(3) 0.9137(6) 0.1701(3) 0.066(3) Uani 1 1 d . . . 
H40A H 1.0151 0.9050 0.1620 0.099 Uiso 1 1 d R . . 
H40B H 0.9951 0.9081 0.2068 0.099 Uiso 1 1 d R . . 
H40C H 0.9705 0.9779 0.1588 0.099 Uiso 1 1 d R . . 
C41 C 0.9296(3) 0.6224(5) 0.0554(3) 0.0416(19) Uani 1 1 d . . . 
H41A H 0.9569 0.6463 0.0460 0.062 Uiso 1 1 d R . . 
H41B H 0.8990 0.6112 0.0248 0.062 Uiso 1 1 d R . . 
H41C H 0.9401 0.5616 0.0742 0.062 Uiso 1 1 d R . . 
C42 C 0.7994(2) 0.3571(5) 0.0763(2) 0.0285(16) Uani 1 1 d . . . 
C43 C 0.7670(2) 0.3299(5) 0.0996(2) 0.0302(16) Uani 1 1 d . . . 
C44 C 0.7663(3) 0.2339(5) 0.1144(2) 0.0371(18) Uani 1 1 d . . . 
H44A H 0.7436 0.2151 0.1297 0.045 Uiso 1 1 calc R . . 
C45 C 0.7985(3) 0.1649(5) 0.1070(3) 0.0352(18) Uani 1 1 d . . . 
C46 C 0.8295(3) 0.1934(5) 0.0831(2) 0.0358(18) Uani 1 1 d . . . 
H46A H 0.8513 0.1467 0.0778 0.043 Uiso 1 1 calc R . . 
C47 C 0.8303(2) 0.2882(5) 0.0664(2) 0.0288(16) Uani 1 1 d . . . 
C48 C 0.7308(3) 0.4022(5) 0.1081(3) 0.046(2) Uani 1 1 d . . . 
H48A H 0.7494 0.4609 0.1241 0.069 Uiso 1 1 d R . . 
H48B H 0.7155 0.3733 0.1299 0.069 Uiso 1 1 d R . . 
H48C H 0.7041 0.4188 0.0753 0.069 Uiso 1 1 d R . . 
C49 C 0.7986(3) 0.0612(5) 0.1246(3) 0.047(2) Uani 1 1 d . . . 
H49A H 0.8235 0.0229 0.1168 0.071 Uiso 1 1 d R . . 
H49B H 0.7649 0.0324 0.1079 0.071 Uiso 1 1 d R . . 
H49C H 0.8080 0.0619 0.1613 0.071 Uiso 1 1 d R . . 
C50 C 0.8619(3) 0.3123(5) 0.0370(3) 0.044(2) Uani 1 1 d . . . 
H50A H 0.8410 0.3466 0.0059 0.066 Uiso 1 1 d R . . 
H50B H 0.8748 0.2522 0.0282 0.066 Uiso 1 1 d R . . 
H50C H 0.8906 0.3533 0.0574 0.066 Uiso 1 1 d R . . 
Cl1 Cl 0.80003(11) 0.9903(2) 0.25695(10) 0.0960(9) Uani 1 1 d DU . . 
C51 C 0.8103(3) 1.0703(6) 0.3039(3) 0.117(4) Uani 1 1 d DU . . 
H51A H 0.8312 1.0374 0.3360 0.141 Uiso 1 1 calc R . . 
H51B H 0.8314 1.1230 0.2990 0.141 Uiso 1 1 calc R . . 
Cl2 Cl 0.76172(10) 1.1225(2) 0.31280(10) 0.0972(9) Uani 1 1 d DU . . 
Cl3 Cl 0.90370(13) 1.0215(2) 0.02728(11) 0.1146(11) Uani 1 1 d DU . . 
C52 C 0.8803(5) 0.9092(5) 0.0162(2) 0.137(5) Uani 1 1 d DU . . 
H52A H 0.9088 0.8645 0.0340 0.165 Uiso 1 1 calc R . . 
H52B H 0.8560 0.9030 0.0328 0.165 Uiso 1 1 calc R . . 
Cl4 Cl 0.85116(15) 0.8676(2) -0.04277(12) 0.1353(14) Uani 1 1 d DU . . 
 
loop_ 
 _atom_site_aniso_label 
 _atom_site_aniso_U_11 
 _atom_site_aniso_U_22 
 _atom_site_aniso_U_33 
 _atom_site_aniso_U_23 
 _atom_site_aniso_U_13 
 _atom_site_aniso_U_12 
Fe1 0.0305(6) 0.0135(5) 0.0276(5) 0.0014(4) 0.0157(4) 0.0034(5) 
Fe2 0.0253(5) 0.0144(5) 0.0282(5) -0.0022(4) 0.0144(4) -0.0002(5) 
O1 0.027(3) 0.011(2) 0.032(2) -0.001(2) 0.018(2) -0.001(2) 
O2 0.034(3) 0.009(2) 0.025(2) 0.0045(19) 0.016(2) 0.006(2) 
N1 0.052(4) 0.016(3) 0.033(3) -0.002(3) 0.022(3) 0.005(3) 
O3 0.195(8) 0.048(4) 0.098(5) -0.004(4) 0.092(5) 0.017(5) 
N2 0.033(4) 0.008(3) 0.048(4) -0.010(3) 0.018(3) 0.000(3) 
O4 0.064(5) 0.046(4) 0.188(8) -0.026(5) 0.030(5) -0.004(4) 
O5 0.029(3) 0.022(3) 0.030(2) 0.005(2) 0.017(2) 0.009(2) 
O6 0.023(3) 0.022(3) 0.031(2) 0.006(2) 0.014(2) -0.001(2) 
C1 0.030(4) 0.014(4) 0.028(4) -0.008(3) 0.013(3) -0.011(3) 
C2 0.028(4) 0.016(4) 0.031(4) 0.004(3) 0.014(3) 0.004(3) 
C3 0.036(4) 0.022(4) 0.031(4) 0.000(3) 0.020(3) 0.003(3) 
C4 0.056(5) 0.026(4) 0.061(5) 0.003(4) 0.039(4) -0.004(4) 
C5 0.055(5) 0.041(5) 0.066(5) -0.001(4) 0.049(4) -0.011(4) 
C6 0.051(5) 0.038(5) 0.051(5) -0.010(4) 0.038(4) 0.003(4) 
C7 0.035(4) 0.026(4) 0.035(4) -0.001(3) 0.020(3) 0.006(3) 
C8 0.030(4) 0.018(4) 0.045(4) -0.003(3) 0.019(4) -0.008(3) 
C9 0.026(4) 0.031(4) 0.039(4) 0.002(4) 0.009(3) 0.003(3) 
C10 0.033(4) 0.036(5) 0.034(4) -0.011(4) 0.010(3) 0.002(4) 
C11 0.032(4) 0.027(4) 0.050(5) -0.011(4) 0.019(4) -0.003(4) 
C12 0.032(4) 0.020(4) 0.046(4) -0.001(4) 0.012(4) 0.005(3) 
C13 0.037(5) 0.024(4) 0.042(4) 0.003(4) 0.022(4) -0.005(3) 
C14 0.039(5) 0.043(5) 0.040(4) -0.010(4) 0.006(4) 0.008(4) 
C15 0.059(6) 0.043(5) 0.077(6) -0.029(5) 0.012(5) 0.015(5) 
C16 0.059(6) 0.033(5) 0.050(5) 0.010(4) 0.023(4) 0.006(4) 
C17 0.038(4) 0.020(4) 0.040(4) -0.006(3) 0.027(4) 0.000(3) 
C18 0.051(5) 0.031(5) 0.037(4) 0.007(4) 0.024(4) 0.016(4) 
C19 0.061(6) 0.021(4) 0.056(5) 0.005(4) 0.034(5) 0.014(4) 
C20 0.065(6) 0.015(4) 0.073(6) -0.003(4) 0.049(5) 0.001(4) 
C21 0.055(5) 0.034(5) 0.046(5) -0.013(4) 0.030(4) -0.005(4) 
C22 0.036(5) 0.034(4) 0.038(4) 0.000(4) 0.026(4) 0.004(4) 
C23 0.052(6) 0.053(6) 0.039(5) 0.003(4) 0.017(4) 0.021(4) 
C24 0.133(9) 0.015(4) 0.100(7) -0.014(5) 0.081(7) -0.018(5) 
C25 0.048(5) 0.036(5) 0.052(5) 0.005(4) 0.019(4) 0.005(4) 
O7 0.029(3) 0.017(3) 0.033(2) -0.001(2) 0.022(2) 0.0036(19) 
O8 0.028(3) 0.018(3) 0.039(3) -0.005(2) 0.016(2) -0.002(2) 
C26 0.026(4) 0.012(4) 0.035(4) 0.004(3) 0.015(3) -0.005(3) 
C27 0.026(4) 0.030(4) 0.025(4) 0.001(3) 0.014(3) 0.005(3) 
C28 0.024(4) 0.023(4) 0.031(4) 0.001(3) 0.016(3) -0.001(3) 
C29 0.039(5) 0.022(4) 0.030(4) 0.011(3) 0.014(4) 0.005(3) 
C30 0.034(4) 0.038(5) 0.030(4) 0.008(4) 0.007(3) 0.007(4) 
C31 0.033(5) 0.027(5) 0.039(4) -0.002(4) 0.010(4) -0.006(3) 
C32 0.025(4) 0.026(4) 0.024(3) -0.004(3) 0.011(3) 0.000(3) 
C33 0.032(4) 0.017(4) 0.027(4) 0.004(3) 0.013(3) -0.003(3) 
C34 0.044(5) 0.017(4) 0.028(4) 0.009(3) 0.016(3) 0.005(3) 
C35 0.055(5) 0.015(4) 0.045(4) 0.004(3) 0.026(4) 0.008(4) 
C36 0.053(5) 0.028(4) 0.033(4) -0.005(3) 0.023(4) -0.017(4) 
C37 0.039(5) 0.041(5) 0.036(4) 0.004(4) 0.023(4) -0.001(4) 
C38 0.029(4) 0.027(4) 0.034(4) 0.000(3) 0.013(3) -0.004(3) 
C39 0.047(5) 0.029(4) 0.058(5) 0.003(4) 0.036(4) 0.013(4) 
C40 0.075(6) 0.051(6) 0.083(6) -0.023(5) 0.042(5) -0.035(5) 
C41 0.043(5) 0.036(5) 0.054(5) -0.005(4) 0.028(4) -0.002(4) 
C42 0.029(4) 0.021(4) 0.033(4) 0.000(3) 0.009(3) -0.002(3) 
C43 0.032(4) 0.026(4) 0.035(4) -0.003(3) 0.016(4) -0.001(3) 
C44 0.035(5) 0.040(5) 0.037(4) 0.002(4) 0.015(4) -0.006(4) 
C45 0.038(5) 0.021(4) 0.037(4) 0.001(3) 0.005(4) -0.008(3) 
C46 0.040(5) 0.026(4) 0.040(4) -0.005(4) 0.014(4) 0.002(4) 
C47 0.032(4) 0.023(4) 0.033(4) -0.007(3) 0.014(3) -0.008(3) 
C48 0.046(5) 0.039(5) 0.064(5) -0.002(4) 0.033(4) -0.003(4) 
C49 0.057(5) 0.016(4) 0.061(5) 0.006(4) 0.015(4) -0.002(4) 
C50 0.059(6) 0.030(5) 0.056(5) -0.006(4) 0.037(4) 0.001(4) 
Cl1 0.109(2) 0.084(2) 0.105(2) 0.0013(17) 0.0527(18) -0.0272(17) 
C51 0.061(7) 0.053(7) 0.240(13) -0.047(8) 0.060(8) -0.019(5) 
Cl2 0.088(2) 0.098(2) 0.102(2) 0.0049(17) 0.0327(17) -0.0008(17) 
Cl3 0.186(3) 0.065(2) 0.123(2) -0.0207(17) 0.094(2) 0.000(2) 
C52 0.175(12) 0.107(9) 0.099(7) 0.055(6) 0.021(8) -0.051(9) 
Cl4 0.247(4) 0.073(2) 0.136(3) -0.028(2) 0.129(3) -0.033(2) 
 
_geom_special_details 
; 
 All esds (except the esd in the dihedral angle between two l.s. planes) 
 are estimated using the full covariance matrix.  The cell esds are taken 
 into account individually in the estimation of esds in distances, angles 
 and torsion angles; correlations between esds in cell parameters are only 
 used when they are defined by crystal symmetry.  An approximate (isotropic) 
 treatment of cell esds is used for estimating esds involving l.s. planes. 
; 
 
loop_ 
 _geom_bond_atom_site_label_1 
 _geom_bond_atom_site_label_2 
 _geom_bond_distance 
 _geom_bond_site_symmetry_2 
 _geom_bond_publ_flag 
Fe1 N1 1.771(5) . ? 
Fe1 O5 2.026(4) . ? 
Fe1 O7 2.083(4) . ? 
Fe1 O2 2.084(4) . ? 
Fe1 O2 2.105(4) 2_755 ? 
Fe1 O1 2.136(4) . ? 
Fe2 N2 1.776(5) . ? 
Fe2 O8 2.024(4) . ? 
Fe2 O6 2.081(4) 2_755 ? 
Fe2 O1 2.091(4) . ? 
Fe2 O1 2.088(4) 2_755 ? 
Fe2 O2 2.130(4) . ? 
O1 Fe2 2.088(4) 2_755 ? 
O1 H1A 1.0000 . ? 
O2 Fe1 2.105(4) 2_755 ? 
O2 H2A 1.0000 . ? 
N1 O3 1.131(7) . ? 
N2 O4 1.127(7) . ? 
O5 C1 1.259(7) . ? 
O6 C1 1.275(7) . ? 
O6 Fe2 2.081(4) 2_755 ? 
C1 C2 1.508(8) . ? 
C2 C7 1.406(8) . ? 
C2 C3 1.409(8) . ? 
C3 C4 1.379(8) . ? 
C3 C8 1.513(8) . ? 
C4 C5 1.380(9) . ? 
C4 H4A 0.9500 . ? 
C5 C6 1.383(9) . ? 
C5 H5A 0.9500 . ? 
C6 C7 1.390(9) . ? 
C6 H6A 0.9500 . ? 
C7 C17 1.518(9) . ? 
C8 C9 1.398(8) . ? 
C8 C13 1.410(9) . ? 
C9 C10 1.417(8) . ? 
C9 C14 1.522(9) . ? 
C10 C11 1.395(9) . ? 
C10 H10A 0.9500 . ? 
C11 C12 1.372(9) . ? 
C11 C15 1.515(9) . ? 
C12 C13 1.380(8) . ? 
C12 H12A 0.9500 . ? 
C13 C16 1.486(9) . ? 
C14 H14A 0.9800 . ? 
C14 H14B 0.9800 . ? 
C14 H14C 0.9800 . ? 
C15 H15A 0.9800 . ? 
C15 H15B 0.9800 . ? 
C15 H15C 0.9800 . ? 
C16 H16A 0.9800 . ? 
C16 H16B 0.9800 . ? 
C16 H16C 0.9800 . ? 
C17 C22 1.378(9) . ? 
C17 C18 1.408(9) . ? 
C18 C19 1.411(9) . ? 
C18 C23 1.494(9) . ? 
C19 C20 1.391(10) . ? 
C19 H19A 0.9500 . ? 
C20 C21 1.378(9) . ? 
C20 C24 1.524(9) . ? 
C21 C22 1.382(9) . ? 
C21 H21A 0.9500 . ? 
C22 C25 1.507(9) . ? 
C23 H23A 0.9800 . ? 
C23 H23B 0.9800 . ? 
C23 H23C 0.9800 . ? 
C24 H24A 0.9800 . ? 
C24 H24B 0.9800 . ? 
C24 H24C 0.9800 . ? 
C25 H25A 0.9800 . ? 
C25 H25B 0.9800 . ? 
C25 H25C 0.9800 . ? 
O7 C26 1.271(7) . ? 
O8 C26 1.273(7) . ? 
C26 C27 1.510(8) . ? 
C27 C32 1.404(9) . ? 
C27 C28 1.409(8) . ? 
C28 C29 1.375(8) . ? 
C28 C33 1.502(8) . ? 
C29 C30 1.363(9) . ? 
C29 H29A 0.9500 . ? 
C30 C31 1.383(8) . ? 
C30 H30A 0.9500 . ? 
C31 C32 1.397(8) . ? 
C31 H31A 0.9500 . ? 
C32 C42 1.498(9) . ? 
C33 C38 1.393(8) . ? 
C33 C34 1.417(8) . ? 
C34 C35 1.398(9) . ? 
C34 C39 1.499(8) . ? 
C35 C36 1.403(9) . ? 
C35 H35A 0.9500 . ? 
C36 C37 1.385(9) . ? 
C36 C40 1.519(9) . ? 
C37 C38 1.392(9) . ? 
C37 H37A 0.9500 . ? 
C38 C41 1.526(9) . ? 
C39 H39A 0.9800 . ? 
C39 H39B 0.9800 . ? 
C39 H39C 0.9800 . ? 
C40 H40A 0.9800 . ? 
C40 H40B 0.9800 . ? 
C40 H40C 0.9800 . ? 
C41 H41A 0.9800 . ? 
C41 H41B 0.9800 . ? 
C41 H41C 0.9800 . ? 
C42 C43 1.392(8) . ? 
C42 C47 1.402(9) . ? 
C43 C44 1.396(8) . ? 
C43 C48 1.524(8) . ? 
C44 C45 1.400(9) . ? 
C44 H44A 0.9500 . ? 
C45 C46 1.374(9) . ? 
C45 C49 1.519(8) . ? 
C46 C47 1.399(8) . ? 
C46 H46A 0.9500 . ? 
C47 C50 1.497(8) . ? 
C48 H48A 0.9800 . ? 
C48 H48B 0.9800 . ? 
C48 H48C 0.9800 . ? 
C49 H49A 0.9800 . ? 
C49 H49B 0.9800 . ? 
C49 H49C 0.9800 . ? 
C50 H50A 0.9800 . ? 
C50 H50B 0.9800 . ? 
C50 H50C 0.9800 . ? 
Cl1 C51 1.678(4) . ? 
C51 Cl2 1.671(4) . ? 
C51 H51A 0.9900 . ? 
C51 H51B 0.9900 . ? 
Cl3 C52 1.670(4) . ? 
C52 Cl4 1.668(4) . ? 
C52 H52A 0.9900 . ? 
C52 H52B 0.9900 . ? 
 
loop_ 
 _geom_angle_atom_site_label_1 
 _geom_angle_atom_site_label_2 
 _geom_angle_atom_site_label_3 
 _geom_angle 
 _geom_angle_site_symmetry_1 
 _geom_angle_site_symmetry_3 
 _geom_angle_publ_flag 
N1 Fe1 O5 91.6(2) . . ? 
N1 Fe1 O7 96.5(2) . . ? 
O5 Fe1 O7 102.51(16) . . ? 
N1 Fe1 O2 103.9(2) . . ? 
O5 Fe1 O2 159.34(16) . . ? 
O7 Fe1 O2 89.42(15) . . ? 
N1 Fe1 O2 99.7(2) . 2_755 ? 
O5 Fe1 O2 89.87(15) . 2_755 ? 
O7 Fe1 O2 159.26(15) . 2_755 ? 
O2 Fe1 O2 74.27(16) . 2_755 ? 
N1 Fe1 O1 176.05(19) . . ? 
O5 Fe1 O1 84.62(15) . . ? 
O7 Fe1 O1 85.30(15) . . ? 
O2 Fe1 O1 79.55(14) . . ? 
O2 Fe1 O1 79.31(15) 2_755 . ? 
N2 Fe2 O8 91.1(2) . . ? 
N2 Fe2 O6 96.8(2) . 2_755 ? 
O8 Fe2 O6 101.55(16) . 2_755 ? 
N2 Fe2 O1 99.2(2) . . ? 
O8 Fe2 O1 90.68(15) . . ? 
O6 Fe2 O1 159.66(16) 2_755 . ? 
N2 Fe2 O1 104.1(2) . 2_755 ? 
O8 Fe2 O1 159.99(16) . 2_755 ? 
O6 Fe2 O1 89.73(15) 2_755 2_755 ? 
O1 Fe2 O1 74.25(16) . 2_755 ? 
N2 Fe2 O2 175.5(2) . . ? 
O8 Fe2 O2 84.61(15) . . ? 
O6 Fe2 O2 85.46(15) 2_755 . ? 
O1 Fe2 O2 79.52(14) . . ? 
O1 Fe2 O2 79.82(14) 2_755 . ? 
Fe2 O1 Fe2 105.64(16) . 2_755 ? 
Fe2 O1 Fe1 98.12(15) . . ? 
Fe2 O1 Fe1 98.48(16) 2_755 . ? 
Fe2 O1 H1A 117.1 . . ? 
Fe2 O1 H1A 117.1 2_755 . ? 
Fe1 O1 H1A 117.1 . . ? 
Fe1 O2 Fe1 105.61(16) . 2_755 ? 
Fe1 O2 Fe2 98.56(16) . . ? 
Fe1 O2 Fe2 98.15(15) 2_755 . ? 
Fe1 O2 H2A 117.1 . . ? 
Fe1 O2 H2A 117.1 2_755 . ? 
Fe2 O2 H2A 117.1 . . ? 
O3 N1 Fe1 155.3(5) . . ? 
O4 N2 Fe2 156.1(6) . . ? 
C1 O5 Fe1 131.5(4) . . ? 
C1 O6 Fe2 126.6(4) . 2_755 ? 
O5 C1 O6 125.8(6) . . ? 
O5 C1 C2 117.3(6) . . ? 
O6 C1 C2 116.9(5) . . ? 
C7 C2 C3 120.3(6) . . ? 
C7 C2 C1 122.8(6) . . ? 
C3 C2 C1 116.8(5) . . ? 
C4 C3 C2 119.0(6) . . ? 
C4 C3 C8 119.8(6) . . ? 
C2 C3 C8 121.1(5) . . ? 
C5 C4 C3 121.8(7) . . ? 
C5 C4 H4A 119.1 . . ? 
C3 C4 H4A 119.1 . . ? 
C4 C5 C6 118.4(6) . . ? 
C4 C5 H5A 120.8 . . ? 
C6 C5 H5A 120.8 . . ? 
C5 C6 C7 122.6(6) . . ? 
C5 C6 H6A 118.7 . . ? 
C7 C6 H6A 118.7 . . ? 
C6 C7 C2 117.8(6) . . ? 
C6 C7 C17 118.0(6) . . ? 
C2 C7 C17 124.1(6) . . ? 
C9 C8 C13 121.3(6) . . ? 
C9 C8 C3 119.1(6) . . ? 
C13 C8 C3 119.6(6) . . ? 
C8 C9 C10 118.6(6) . . ? 
C8 C9 C14 122.2(6) . . ? 
C10 C9 C14 119.1(6) . . ? 
C11 C10 C9 120.2(6) . . ? 
C11 C10 H10A 119.9 . . ? 
C9 C10 H10A 119.9 . . ? 
C12 C11 C10 119.0(6) . . ? 
C12 C11 C15 121.8(7) . . ? 
C10 C11 C15 119.2(6) . . ? 
C11 C12 C13 123.4(7) . . ? 
C11 C12 H12A 118.3 . . ? 
C13 C12 H12A 118.3 . . ? 
C12 C13 C8 117.5(6) . . ? 
C12 C13 C16 120.2(6) . . ? 
C8 C13 C16 122.2(6) . . ? 
C9 C14 H14A 109.1 . . ? 
C9 C14 H14B 109.3 . . ? 
H14A C14 H14B 109.5 . . ? 
C9 C14 H14C 110.0 . . ? 
H14A C14 H14C 109.5 . . ? 
H14B C14 H14C 109.5 . . ? 
C11 C15 H15A 109.1 . . ? 
C11 C15 H15B 110.3 . . ? 
H15A C15 H15B 109.5 . . ? 
C11 C15 H15C 109.0 . . ? 
H15A C15 H15C 109.5 . . ? 
H15B C15 H15C 109.5 . . ? 
C13 C16 H16A 110.1 . . ? 
C13 C16 H16B 108.7 . . ? 
H16A C16 H16B 109.5 . . ? 
C13 C16 H16C 109.6 . . ? 
H16A C16 H16C 109.5 . . ? 
H16B C16 H16C 109.5 . . ? 
C22 C17 C18 121.4(6) . . ? 
C22 C17 C7 119.7(6) . . ? 
C18 C17 C7 118.8(6) . . ? 
C19 C18 C17 117.2(7) . . ? 
C19 C18 C23 119.3(7) . . ? 
C17 C18 C23 123.4(7) . . ? 
C20 C19 C18 121.5(7) . . ? 
C20 C19 H19A 119.3 . . ? 
C18 C19 H19A 119.3 . . ? 
C21 C20 C19 118.8(7) . . ? 
C21 C20 C24 120.9(8) . . ? 
C19 C20 C24 120.3(7) . . ? 
C20 C21 C22 121.6(7) . . ? 
C20 C21 H21A 119.2 . . ? 
C22 C21 H21A 119.2 . . ? 
C17 C22 C21 119.5(7) . . ? 
C17 C22 C25 121.2(6) . . ? 
C21 C22 C25 119.2(7) . . ? 
C18 C23 H23A 109.5 . . ? 
C18 C23 H23B 109.4 . . ? 
H23A C23 H23B 109.5 . . ? 
C18 C23 H23C 109.5 . . ? 
H23A C23 H23C 109.5 . . ? 
H23B C23 H23C 109.5 . . ? 
C20 C24 H24A 109.0 . . ? 
C20 C24 H24B 109.7 . . ? 
H24A C24 H24B 109.5 . . ? 
C20 C24 H24C 109.8 . . ? 
H24A C24 H24C 109.5 . . ? 
H24B C24 H24C 109.5 . . ? 
C22 C25 H25A 109.0 . . ? 
C22 C25 H25B 110.5 . . ? 
H25A C25 H25B 109.5 . . ? 
C22 C25 H25C 108.9 . . ? 
H25A C25 H25C 109.5 . . ? 
H25B C25 H25C 109.5 . . ? 
C26 O7 Fe1 127.7(4) . . ? 
C26 O8 Fe2 131.2(4) . . ? 
O7 C26 O8 125.2(6) . . ? 
O7 C26 C27 118.3(6) . . ? 
O8 C26 C27 116.5(6) . . ? 
C32 C27 C28 120.2(6) . . ? 
C32 C27 C26 122.7(6) . . ? 
C28 C27 C26 117.0(6) . . ? 
C29 C28 C27 118.9(6) . . ? 
C29 C28 C33 120.7(6) . . ? 
C27 C28 C33 120.4(6) . . ? 
C30 C29 C28 121.8(6) . . ? 
C30 C29 H29A 119.1 . . ? 
C28 C29 H29A 119.1 . . ? 
C29 C30 C31 119.6(6) . . ? 
C29 C30 H30A 120.2 . . ? 
C31 C30 H30A 120.2 . . ? 
C30 C31 C32 121.3(6) . . ? 
C30 C31 H31A 119.4 . . ? 
C32 C31 H31A 119.4 . . ? 
C31 C32 C27 118.1(6) . . ? 
C31 C32 C42 118.1(6) . . ? 
C27 C32 C42 123.8(6) . . ? 
C38 C33 C34 120.3(6) . . ? 
C38 C33 C28 119.9(6) . . ? 
C34 C33 C28 119.8(6) . . ? 
C35 C34 C33 118.6(6) . . ? 
C35 C34 C39 120.0(6) . . ? 
C33 C34 C39 121.2(6) . . ? 
C34 C35 C36 121.5(6) . . ? 
C34 C35 H35A 119.3 . . ? 
C36 C35 H35A 119.3 . . ? 
C37 C36 C35 118.3(6) . . ? 
C37 C36 C40 121.4(7) . . ? 
C35 C36 C40 120.3(6) . . ? 
C36 C37 C38 122.0(6) . . ? 
C36 C37 H37A 119.0 . . ? 
C38 C37 H37A 119.0 . . ? 
C37 C38 C33 119.3(6) . . ? 
C37 C38 C41 119.2(6) . . ? 
C33 C38 C41 121.5(6) . . ? 
C34 C39 H39A 109.6 . . ? 
C34 C39 H39B 109.4 . . ? 
H39A C39 H39B 109.5 . . ? 
C34 C39 H39C 109.5 . . ? 
H39A C39 H39C 109.5 . . ? 
H39B C39 H39C 109.5 . . ? 
C36 C40 H40A 110.4 . . ? 
C36 C40 H40B 109.2 . . ? 
H40A C40 H40B 109.5 . . ? 
C36 C40 H40C 108.8 . . ? 
H40A C40 H40C 109.5 . . ? 
H40B C40 H40C 109.5 . . ? 
C38 C41 H41A 110.0 . . ? 
C38 C41 H41B 109.4 . . ? 
H41A C41 H41B 109.5 . . ? 
C38 C41 H41C 109.0 . . ? 
H41A C41 H41C 109.5 . . ? 
H41B C41 H41C 109.5 . . ? 
C43 C42 C47 120.5(6) . . ? 
C43 C42 C32 119.9(6) . . ? 
C47 C42 C32 119.5(6) . . ? 
C44 C43 C42 119.6(6) . . ? 
C44 C43 C48 118.9(6) . . ? 
C42 C43 C48 121.5(6) . . ? 
C43 C44 C45 120.8(6) . . ? 
C43 C44 H44A 119.6 . . ? 
C45 C44 H44A 119.6 . . ? 
C46 C45 C44 118.3(6) . . ? 
C46 C45 C49 121.2(7) . . ? 
C44 C45 C49 120.5(6) . . ? 
C45 C46 C47 122.7(6) . . ? 
C45 C46 H46A 118.7 . . ? 
C47 C46 H46A 118.7 . . ? 
C46 C47 C42 118.0(6) . . ? 
C46 C47 C50 119.8(6) . . ? 
C42 C47 C50 122.2(6) . . ? 
C43 C48 H48A 109.9 . . ? 
C43 C48 H48B 109.7 . . ? 
H48A C48 H48B 109.5 . . ? 
C43 C48 H48C 108.9 . . ? 
H48A C48 H48C 109.5 . . ? 
H48B C48 H48C 109.5 . . ? 
C45 C49 H49A 109.9 . . ? 
C45 C49 H49B 110.2 . . ? 
H49A C49 H49B 109.5 . . ? 
C45 C49 H49C 108.2 . . ? 
H49A C49 H49C 109.5 . . ? 
H49B C49 H49C 109.5 . . ? 
C47 C50 H50A 109.2 . . ? 
C47 C50 H50B 109.2 . . ? 
H50A C50 H50B 109.5 . . ? 
C47 C50 H50C 110.0 . . ? 
H50A C50 H50C 109.5 . . ? 
H50B C50 H50C 109.5 . . ? 
Cl2 C51 Cl1 120.8(5) . . ? 
Cl2 C51 H51A 107.1 . . ? 
Cl1 C51 H51A 107.1 . . ? 
Cl2 C51 H51B 107.1 . . ? 
Cl1 C51 H51B 107.1 . . ? 
H51A C51 H51B 106.8 . . ? 
Cl4 C52 Cl3 121.1(5) . . ? 
Cl4 C52 H52A 107.1 . . ? 
Cl3 C52 H52A 107.1 . . ? 
Cl4 C52 H52B 107.1 . . ? 
Cl3 C52 H52B 107.1 . . ? 
H52A C52 H52B 106.8 . . ? 
 
loop_ 
 _geom_torsion_atom_site_label_1 
 _geom_torsion_atom_site_label_2 
 _geom_torsion_atom_site_label_3 
 _geom_torsion_atom_site_label_4 
 _geom_torsion 
 _geom_torsion_site_symmetry_1 
 _geom_torsion_site_symmetry_2 
 _geom_torsion_site_symmetry_3 
 _geom_torsion_site_symmetry_4 
 _geom_torsion_publ_flag 
N2 Fe2 O1 Fe2 98.6(2) . . . 2_755 ? 
O8 Fe2 O1 Fe2 -170.22(17) . . . 2_755 ? 
O6 Fe2 O1 Fe2 -42.8(5) 2_755 . . 2_755 ? 
O1 Fe2 O1 Fe2 -3.6(2) 2_755 . . 2_755 ? 
O2 Fe2 O1 Fe2 -85.83(18) . . . 2_755 ? 
N2 Fe2 O1 Fe1 -160.2(2) . . . . ? 
O8 Fe2 O1 Fe1 -69.00(17) . . . . ? 
O6 Fe2 O1 Fe1 58.5(5) 2_755 . . . ? 
O1 Fe2 O1 Fe1 97.66(13) 2_755 . . . ? 
O2 Fe2 O1 Fe1 15.39(14) . . . . ? 
N1 Fe1 O1 Fe2 -168(3) . . . . ? 
O5 Fe1 O1 Fe2 177.59(18) . . . . ? 
O7 Fe1 O1 Fe2 74.53(16) . . . . ? 
O2 Fe1 O1 Fe2 -15.74(14) . . . . ? 
O2 Fe1 O1 Fe2 -91.52(16) 2_755 . . . ? 
N1 Fe1 O1 Fe2 -61(3) . . . 2_755 ? 
O5 Fe1 O1 Fe2 -75.15(16) . . . 2_755 ? 
O7 Fe1 O1 Fe2 -178.21(16) . . . 2_755 ? 
O2 Fe1 O1 Fe2 91.51(16) . . . 2_755 ? 
O2 Fe1 O1 Fe2 15.74(13) 2_755 . . 2_755 ? 
N1 Fe1 O2 Fe1 92.6(2) . . . 2_755 ? 
O5 Fe1 O2 Fe1 -44.9(5) . . . 2_755 ? 
O7 Fe1 O2 Fe1 -170.86(17) . . . 2_755 ? 
O2 Fe1 O2 Fe1 -3.8(2) 2_755 . . 2_755 ? 
O1 Fe1 O2 Fe1 -85.54(17) . . . 2_755 ? 
N1 Fe1 O2 Fe2 -166.4(2) . . . . ? 
O5 Fe1 O2 Fe2 56.1(5) . . . . ? 
O7 Fe1 O2 Fe2 -69.85(16) . . . . ? 
O2 Fe1 O2 Fe2 97.18(13) 2_755 . . . ? 
O1 Fe1 O2 Fe2 15.47(14) . . . . ? 
N2 Fe2 O2 Fe1 58(3) . . . . ? 
O8 Fe2 O2 Fe1 75.88(16) . . . . ? 
O6 Fe2 O2 Fe1 177.97(18) 2_755 . . . ? 
O1 Fe2 O2 Fe1 -15.81(14) . . . . ? 
O1 Fe2 O2 Fe1 -91.49(16) 2_755 . . . ? 
N2 Fe2 O2 Fe1 166(3) . . . 2_755 ? 
O8 Fe2 O2 Fe1 -176.87(17) . . . 2_755 ? 
O6 Fe2 O2 Fe1 -74.79(16) 2_755 . . 2_755 ? 
O1 Fe2 O2 Fe1 91.43(16) . . . 2_755 ? 
O1 Fe2 O2 Fe1 15.75(13) 2_755 . . 2_755 ? 
O5 Fe1 N1 O3 15.7(16) . . . . ? 
O7 Fe1 N1 O3 118.5(16) . . . . ? 
O2 Fe1 N1 O3 -150.5(15) . . . . ? 
O2 Fe1 N1 O3 -74.5(16) 2_755 . . . ? 
O1 Fe1 N1 O3 1(4) . . . . ? 
O8 Fe2 N2 O4 -11.2(16) . . . . ? 
O6 Fe2 N2 O4 -113.0(16) 2_755 . . . ? 
O1 Fe2 N2 O4 79.6(16) . . . . ? 
O1 Fe2 N2 O4 155.6(15) 2_755 . . . ? 
O2 Fe2 N2 O4 6(4) . . . . ? 
N1 Fe1 O5 C1 -137.7(5) . . . . ? 
O7 Fe1 O5 C1 125.3(5) . . . . ? 
O2 Fe1 O5 C1 1.3(8) . . . . ? 
O2 Fe1 O5 C1 -38.0(5) 2_755 . . . ? 
O1 Fe1 O5 C1 41.3(5) . . . . ? 
Fe1 O5 C1 O6 11.3(9) . . . . ? 
Fe1 O5 C1 C2 -166.7(4) . . . . ? 
Fe2 O6 C1 O5 -23.4(9) 2_755 . . . ? 
Fe2 O6 C1 C2 154.6(4) 2_755 . . . ? 
O5 C1 C2 C7 -66.6(8) . . . . ? 
O6 C1 C2 C7 115.1(7) . . . . ? 
O5 C1 C2 C3 110.2(6) . . . . ? 
O6 C1 C2 C3 -68.1(8) . . . . ? 
C7 C2 C3 C4 -2.4(10) . . . . ? 
C1 C2 C3 C4 -179.3(6) . . . . ? 
C7 C2 C3 C8 174.9(6) . . . . ? 
C1 C2 C3 C8 -2.0(9) . . . . ? 
C2 C3 C4 C5 0.2(10) . . . . ? 
C8 C3 C4 C5 -177.1(7) . . . . ? 
C3 C4 C5 C6 0.8(11) . . . . ? 
C4 C5 C6 C7 0.5(12) . . . . ? 
C5 C6 C7 C2 -2.6(11) . . . . ? 
C5 C6 C7 C17 -179.1(7) . . . . ? 
C3 C2 C7 C6 3.5(10) . . . . ? 
C1 C2 C7 C6 -179.8(6) . . . . ? 
C3 C2 C7 C17 179.8(6) . . . . ? 
C1 C2 C7 C17 -3.5(10) . . . . ? 
C4 C3 C8 C9 98.0(8) . . . . ? 
C2 C3 C8 C9 -79.4(8) . . . . ? 
C4 C3 C8 C13 -80.5(8) . . . . ? 
C2 C3 C8 C13 102.2(7) . . . . ? 
C13 C8 C9 C10 -1.5(10) . . . . ? 
C3 C8 C9 C10 -179.9(6) . . . . ? 
C13 C8 C9 C14 176.7(6) . . . . ? 
C3 C8 C9 C14 -1.7(10) . . . . ? 
C8 C9 C10 C11 2.6(10) . . . . ? 
C14 C9 C10 C11 -175.7(6) . . . . ? 
C9 C10 C11 C12 -2.2(10) . . . . ? 
C9 C10 C11 C15 178.4(6) . . . . ? 
C10 C11 C12 C13 0.7(11) . . . . ? 
C15 C11 C12 C13 -179.9(7) . . . . ? 
C11 C12 C13 C8 0.3(10) . . . . ? 
C11 C12 C13 C16 -176.2(6) . . . . ? 
C9 C8 C13 C12 0.1(10) . . . . ? 
C3 C8 C13 C12 178.5(6) . . . . ? 
C9 C8 C13 C16 176.5(6) . . . . ? 
C3 C8 C13 C16 -5.1(9) . . . . ? 
C6 C7 C17 C22 78.8(8) . . . . ? 
C2 C7 C17 C22 -97.5(8) . . . . ? 
C6 C7 C17 C18 -97.9(8) . . . . ? 
C2 C7 C17 C18 85.8(8) . . . . ? 
C22 C17 C18 C19 0.4(9) . . . . ? 
C7 C17 C18 C19 177.0(6) . . . . ? 
C22 C17 C18 C23 -177.1(6) . . . . ? 
C7 C17 C18 C23 -0.5(9) . . . . ? 
C17 C18 C19 C20 0.0(10) . . . . ? 
C23 C18 C19 C20 177.6(6) . . . . ? 
C18 C19 C20 C21 -1.5(11) . . . . ? 
C18 C19 C20 C24 -179.2(6) . . . . ? 
C19 C20 C21 C22 2.7(11) . . . . ? 
C24 C20 C21 C22 -179.6(7) . . . . ? 
C18 C17 C22 C21 0.8(10) . . . . ? 
C7 C17 C22 C21 -175.8(6) . . . . ? 
C18 C17 C22 C25 177.5(6) . . . . ? 
C7 C17 C22 C25 0.9(9) . . . . ? 
C20 C21 C22 C17 -2.4(10) . . . . ? 
C20 C21 C22 C25 -179.2(6) . . . . ? 
N1 Fe1 O7 C26 126.9(5) . . . . ? 
O5 Fe1 O7 C26 -140.1(5) . . . . ? 
O2 Fe1 O7 C26 22.9(5) . . . . ? 
O2 Fe1 O7 C26 -14.7(8) 2_755 . . . ? 
O1 Fe1 O7 C26 -56.7(5) . . . . ? 
N2 Fe2 O8 C26 135.4(5) . . . . ? 
O6 Fe2 O8 C26 -127.5(5) 2_755 . . . ? 
O1 Fe2 O8 C26 36.2(5) . . . . ? 
O1 Fe2 O8 C26 -4.3(8) 2_755 . . . ? 
O2 Fe2 O8 C26 -43.3(5) . . . . ? 
Fe1 O7 C26 O8 21.3(9) . . . . ? 
Fe1 O7 C26 C27 -155.0(4) . . . . ? 
Fe2 O8 C26 O7 -8.1(9) . . . . ? 
Fe2 O8 C26 C27 168.3(4) . . . . ? 
O7 C26 C27 C32 -114.8(7) . . . . ? 
O8 C26 C27 C32 68.6(8) . . . . ? 
O7 C26 C27 C28 69.3(7) . . . . ? 
O8 C26 C27 C28 -107.3(6) . . . . ? 
C32 C27 C28 C29 3.2(9) . . . . ? 
C26 C27 C28 C29 179.1(5) . . . . ? 
C32 C27 C28 C33 -175.0(6) . . . . ? 
C26 C27 C28 C33 0.9(8) . . . . ? 
C27 C28 C29 C30 -0.1(9) . . . . ? 
C33 C28 C29 C30 178.1(6) . . . . ? 
C28 C29 C30 C31 -1.8(10) . . . . ? 
C29 C30 C31 C32 0.7(10) . . . . ? 
C30 C31 C32 C27 2.3(9) . . . . ? 
C30 C31 C32 C42 179.9(6) . . . . ? 
C28 C27 C32 C31 -4.2(9) . . . . ? 
C26 C27 C32 C31 -179.9(6) . . . . ? 
C28 C27 C32 C42 178.3(6) . . . . ? 
C26 C27 C32 C42 2.6(9) . . . . ? 
C29 C28 C33 C38 -97.0(8) . . . . ? 
C27 C28 C33 C38 81.2(7) . . . . ? 
C29 C28 C33 C34 81.0(8) . . . . ? 
C27 C28 C33 C34 -100.8(7) . . . . ? 
C38 C33 C34 C35 -0.1(9) . . . . ? 
C28 C33 C34 C35 -178.1(6) . . . . ? 
C38 C33 C34 C39 -175.3(6) . . . . ? 
C28 C33 C34 C39 6.7(9) . . . . ? 
C33 C34 C35 C36 -1.5(9) . . . . ? 
C39 C34 C35 C36 173.8(6) . . . . ? 
C34 C35 C36 C37 1.0(10) . . . . ? 
C34 C35 C36 C40 -179.9(6) . . . . ? 
C35 C36 C37 C38 1.0(10) . . . . ? 
C40 C36 C37 C38 -178.0(7) . . . . ? 
C36 C37 C38 C33 -2.5(10) . . . . ? 
C36 C37 C38 C41 176.7(6) . . . . ? 
C34 C33 C38 C37 2.0(9) . . . . ? 
C28 C33 C38 C37 -180.0(6) . . . . ? 
C34 C33 C38 C41 -177.2(6) . . . . ? 
C28 C33 C38 C41 0.8(9) . . . . ? 
C31 C32 C42 C43 -79.5(8) . . . . ? 
C27 C32 C42 C43 98.0(8) . . . . ? 
C31 C32 C42 C47 96.7(7) . . . . ? 
C27 C32 C42 C47 -85.9(8) . . . . ? 
C47 C42 C43 C44 1.5(10) . . . . ? 
C32 C42 C43 C44 177.6(6) . . . . ? 
C47 C42 C43 C48 -176.5(6) . . . . ? 
C32 C42 C43 C48 -0.4(9) . . . . ? 
C42 C43 C44 C45 1.3(10) . . . . ? 
C48 C43 C44 C45 179.4(6) . . . . ? 
C43 C44 C45 C46 -2.3(10) . . . . ? 
C43 C44 C45 C49 178.1(6) . . . . ? 
C44 C45 C46 C47 0.3(10) . . . . ? 
C49 C45 C46 C47 180.0(6) . . . . ? 
C45 C46 C47 C42 2.5(10) . . . . ? 
C45 C46 C47 C50 -175.0(6) . . . . ? 
C43 C42 C47 C46 -3.4(10) . . . . ? 
C32 C42 C47 C46 -179.5(6) . . . . ? 
C43 C42 C47 C50 174.0(6) . . . . ? 
C32 C42 C47 C50 -2.1(10) . . . . ? 
 
_diffrn_measured_fraction_theta_max    0.994 
_diffrn_reflns_theta_full              25.11 
_diffrn_measured_fraction_theta_full   0.994 
_refine_diff_density_max    1.030 
_refine_diff_density_min   -0.800 
_refine_diff_density_rms    0.108 
